# Supplementary material for: The vacuolar-ATPase complex and assembly factors, TMEM199 and CCDC115, control HIF1α prolyl hydroxylation by regulating cellular iron levels
Source: eLife. 2017 Mar 15;6:e22693. doi: 10.7554/eLife.22693 (PMC5391204; doi:10.7554/eLife.22693)
Supplement: Supplemental file 1. — DOI: http://dx.doi.org/10.7554/eLife.22693.015 [file elife-22693-fig1.xlsx]

## Sheet: Annotation
Input ID	Gene ID	Type	Tax ID	Homologene Gene ID	Homologene Gene Tax ID	Gene Symbol	Description	Biological Process (GO)	Cellular Component (GO)	GOSlim (Ontology)	Molecular Function (GO)	Kinase Class (UniProt)	Protein Function (Protein Atlas)	Subcellular Location (Protein Atlas)	Drug (DrugBank)	Canonical Pathways	Hallmark Gene Sets	GO:0033572 transferrin transport	M180 PID HIF1A PATHWAY	GO:0098660 inorganic ion transmembrane tr	GO:0032007 negative regulation of TOR sig	GO:0007507 heart development	GO:0046782 regulation of viral transcript	GO:0032941 secretion by tissue	GO:0017148 negative regulation of transla	GO:0032844 regulation of homeostatic proc	GO:0060334 regulation of interferon-gamma	GO:0046487 glyoxylate metabolic process	GO:0008285 negative regulation of cell pr	GO:0021543 pallium development	GO:0006913 nucleocytoplasmic transport	GO:0035637 multicellular organismal signa	GO:1903311 regulation of mRNA metabolic p	GO:0001503 ossification	M254 PID MYC REPRESS PATHWAY	GO:0050672 negative regulation of lymphoc	hsa05100 Bacterial invasion of epitheli
PTPN1	5770	symbol	9606	5770	Human	PTPN1	protein tyrosine phosphatase, non-receptor type 1	GO:0007257 activation of JUN kinase activity;GO:1990264 peptidyl-tyrosine dephosphorylation involved in inactivation of protein kinase activity;GO:1903898 negative regulation of PERK-mediated unfolded protein response	GO:0098554 cytoplasmic side of endoplasmic reticulum membrane;GO:0097443 sorting endosome;GO:0005769 early endosome	[GO:0003723] RNA binding;[GO:0016791] phosphatase activity;[GO:0003674] molecular_function;[GO:0002376] immune system process;[GO:0005575] cellular_component;[GO:0005622] intracellular;[GO:0006810] transport;[GO:0043167] ion binding;[GO:0009056] catabolic process;[GO:0006950] response to stress;[GO:0008219] cell death;[GO:0016192] vesicle-mediated transport;[GO:0019899] enzyme binding;[GO:0007010…	GO:0030971 receptor tyrosine kinase binding;GO:0051721 protein phosphatase 2A binding;GO:0004725 protein tyrosine phosphatase activity		Enzymes/ENZYME proteins/Hydrolases	Endoplasmic reticulum	Tiludronate (Zinc ion binding);3-(Oxalyl-Amino)-Naphthalene-2-Carboxylic Acid (Zinc ion binding);Double Oxidized Cysteine (Zinc ion binding);Compound 12, N-Acetyl-4-[(Carboxycarbonyl)(2-Carboxyphenyl)Amino]-N-Pentyl-1-Napthylalaniamide (Zinc ion binding);Compound 9 (Zinc ion binding);2-(Oxalyl-Amino)-4,7-Dihydro-5h-Thieno[2,3-C]Thiopyran-3-Carboxylic Acid (Zinc ion binding);3-(3,5-Dibromo-4-Hydro…	(M125)PID IGF1 PATHWAY; (M266)PID NCADHERIN PATHWAY; (M127)PID ERBB1 RECEPTOR PROXIMAL PATHWAY	(M5897)HALLMARK IL6 JAK STAT3 SIGNALING; (M5913)HALLMARK INTERFERON GAMMA RESPONSE	1.0	0.0	0.0	1.0	1.0	0.0	1.0	0.0	0.0	1.0	0.0	0.0	0.0	1.0	0.0	0.0	0.0	0.0	0.0	0.0
EGLN1	54583	symbol	9606	54583	Human	EGLN1	egl-9 family hypoxia inducible factor 1	GO:0030821 negative regulation of cAMP catabolic process;GO:0030820 regulation of cAMP catabolic process;GO:0030806 negative regulation of cyclic nucleotide catabolic process	GO:0005829 cytosol;GO:0005634 nucleus;GO:0044444 cytoplasmic part	[GO:0043167] ion binding;[GO:0005575] cellular_component;[GO:0005622] intracellular;[GO:0005634] nucleus;[GO:0005737] cytoplasm;[GO:0005623] cell;[GO:0043226] organelle;[GO:0009790] embryo development;[GO:0048646] anatomical structure formation involved in morphogenesis;[GO:0048856] anatomical structure development;[GO:0003674] molecular_function;[GO:0006950] response to stress;[GO:0000003] repro…	GO:0031545 peptidyl-proline 4-dioxygenase activity;GO:0031543 peptidyl-proline dioxygenase activity;GO:0031418 L-ascorbic acid binding		Enzymes/ENZYME proteins/Oxidoreductases	Cytoplasm	Vitamin C (Peptidyl-proline dioxygenase activity);FG-4592 (Peptidyl-proline dioxygenase activity);N-[(4-HYDROXY-8-IODOISOQUINOLIN-3-YL)CARBONYL]GLYCINE (Peptidyl-proline dioxygenase activity);N-[(1-CHLORO-4-HYDROXYISOQUINOLIN-3-YL)CARBONYL]GLYCINE (Peptidyl-proline dioxygenase activity)	(M180)PID HIF1A PATHWAY; (M44)PID HIF2PATHWAY; (M255)PID HIF1 TFPATHWAY		1.0	1.0	0.0	0.0	1.0	0.0	0.0	0.0	0.0	0.0	0.0	1.0	0.0	0.0	0.0	0.0	0.0	0.0	0.0	0.0
NF1	4763	symbol	9606	4763	Human	NF1	neurofibromin 1	GO:0061534 gamma-aminobutyric acid secretion, neurotransmission;GO:0045762 positive regulation of adenylate cyclase activity;GO:0021897 forebrain astrocyte development	GO:0031235 intrinsic component of the cytoplasmic side of the plasma membrane;GO:0009898 cytoplasmic side of plasma membrane;GO:0098562 cytoplasmic side of membrane		GO:0008429 phosphatidylethanolamine binding;GO:0031210 phosphatidylcholine binding;GO:0005096 GTPase activator activity		RAS pathway related proteins	Mitochondria		(M269)PID RAS PATHWAY; (M240)PID SYNDECAN 2 PATHWAY; (M106)PID HNF3B PATHWAY	(M5919)HALLMARK HEDGEHOG SIGNALING; (M5915)HALLMARK APICAL JUNCTION; (M5893)HALLMARK MITOTIC SPINDLE	1.0	1.0	0.0	1.0	1.0	0.0	0.0	0.0	1.0	1.0	0.0	1.0	1.0	1.0	0.0	0.0	1.0	0.0	0.0	0.0
HIF1A	3091	symbol	9606	3091	Human	HIF1A	hypoxia inducible factor 1 alpha subunit	GO:0021502 neural fold elevation formation;GO:0045821 positive regulation of glycolytic process;GO:0061419 positive regulation of transcription from RNA polymerase II promoter in response to hypoxia	GO:0016607 nuclear speck;GO:0090575 RNA polymerase II transcription factor complex;GO:0016604 nuclear body		GO:0051879 Hsp90 protein binding;GO:0035035 histone acetyltransferase binding;GO:0003705 transcription factor activity, RNA polymerase II distal enhancer sequence-specific binding		Transcription factors/Basic domains		Carvedilol (Ubiquitin protein ligase binding);2-Methoxyestradiol (Ubiquitin protein ligase binding);N-[(1-CHLORO-4-HYDROXYISOQUINOLIN-3-YL)CARBONYL]GLYCINE (Ubiquitin protein ligase binding)	(M180)PID HIF1A PATHWAY; (M226)PID VEGFR1 PATHWAY; (M288)PID HES HEY PATHWAY	(M5901)HALLMARK G2M CHECKPOINT; (M5950)HALLMARK ALLOGRAFT REJECTION; (M5913)HALLMARK INTERFERON GAMMA RESPONSE	1.0	1.0	0.0	1.0	1.0	0.0	1.0	0.0	1.0	1.0	0.0	0.0	1.0	0.0	1.0	0.0	1.0	0.0	0.0	0.0
WT1	7490	symbol	9606	7490	Human	WT1	Wilms tumor 1	GO:0072302 negative regulation of metanephric glomerular mesangial cell proliferation;GO:0072301 regulation of metanephric glomerular mesangial cell proliferation;GO:2001076 positive regulation of metanephric ureteric bud development	GO:0016607 nuclear speck;GO:0016604 nuclear body;GO:0044451 nucleoplasm part	[GO:0008219] cell death;[GO:0008283] cell proliferation;[GO:0030198] extracellular matrix organization;[GO:0043167] ion binding;[GO:0048646] anatomical structure formation involved in morphogenesis;[GO:0040007] growth;[GO:0003723] RNA binding;[GO:0005634] nucleus;[GO:0005623] cell;[GO:0005737] cytoplasm;[GO:0043226] organelle;[GO:0005654] nucleoplasm;[GO:0005730] nucleolus;[GO:0006412] translatio…	GO:0070742 C2H2 zinc finger domain binding;GO:0001077 transcriptional activator activity, RNA polymerase II core promoter proximal region sequence-specific binding;GO:0001228 transcriptional activator activity, RNA polymerase II transcription regulatory region sequence-specific binding		Transcription factors/Zinc-coordinating DNA-binding domains			(M105)PID TELOMERASE PATHWAY; (M19)PID P73PATHWAY		1.0	0.0	0.0	0.0	1.0	0.0	0.0	1.0	0.0	0.0	0.0	1.0	0.0	0.0	0.0	0.0	0.0	0.0	0.0	0.0
LIAS	11019	symbol	9606	11019	Human	LIAS	lipoic acid synthetase	GO:0009107 lipoate biosynthetic process;GO:0009106 lipoate metabolic process;GO:0001843 neural tube closure	GO:0005759 mitochondrial matrix;GO:0044429 mitochondrial part;GO:0005739 mitochondrion	[GO:0005737] cytoplasm;[GO:0005623] cell;[GO:0043226] organelle;[GO:0005739] mitochondrion;[GO:0006950] response to stress;[GO:0006629] lipid metabolic process;[GO:0009058] biosynthetic process;[GO:0051186] cofactor metabolic process;[GO:0006790] sulfur compound metabolic process;[GO:0016874] ligase activity;[GO:0043167] ion binding;[GO:0008150] biological_process;[GO:0003674] molecular_function;…	GO:0016992 lipoate synthase activity;GO:0016979 lipoate-protein ligase activity;GO:0070283 radical SAM enzyme activity		Enzymes/ENZYME proteins/Transferases;Mitochondrial proteins	Nucleus but not nucleoli	Lipoic Acid (Metal ion binding)			0.0	0.0	0.0	1.0	1.0	0.0	0.0	0.0	0.0	0.0	1.0	0.0	0.0	0.0	0.0	0.0	0.0	0.0	0.0	0.0
AC069368.3						None	None	None	None	None	None	None	None	None	None	None	None	nan	nan	nan	nan	nan	nan	nan	nan	nan	nan	nan	nan	nan	nan	nan	nan	nan	nan	nan	nan
IWS1	55677	symbol	9606	55677	Human	IWS1	IWS1, SUPT6H interacting protein	GO:2001253 regulation of histone H3-K36 trimethylation;GO:0097198 histone H3-K36 trimethylation;GO:0000414 regulation of histone H3-K36 methylation	GO:0005654 nucleoplasm;GO:0031981 nuclear lumen;GO:0044428 nuclear part		GO:0003677 DNA binding;GO:0003676 nucleic acid binding;GO:1901363 heterocyclic compound binding			Nucleus but not nucleoli				0.0	0.0	0.0	0.0	0.0	0.0	0.0	0.0	0.0	0.0	0.0	0.0	0.0	1.0	0.0	1.0	0.0	0.0	0.0	0.0
OGDH	4967	symbol	9606	4967	Human	OGDH	oxoglutarate dehydrogenase	GO:0061034 olfactory bulb mitral cell layer development;GO:0021860 pyramidal neuron development;GO:0022028 tangential migration from the subventricular zone to the olfactory bulb	GO:0045252 oxoglutarate dehydrogenase complex;GO:0045240 dihydrolipoyl dehydrogenase complex;GO:0045239 tricarboxylic acid cycle enzyme complex		GO:0034602 oxoglutarate dehydrogenase (NAD+) activity;GO:0004591 oxoglutarate dehydrogenase (succinyl-transferring) activity;GO:0030976 thiamine pyrophosphate binding		Citric acid cycle related proteins;Enzymes/ENZYME proteins/Oxidoreductases;Mitochondrial proteins	Mitochondria	NADH (Thiamine pyrophosphate binding);Valproic Acid (Thiamine pyrophosphate binding)		(M5936)HALLMARK OXIDATIVE PHOSPHORYLATION	0.0	0.0	0.0	0.0	0.0	0.0	1.0	0.0	0.0	0.0	1.0	0.0	1.0	0.0	0.0	0.0	0.0	0.0	0.0	0.0
CRAMP1L	57354	symbol	10090	57585	Human	CRAMP1	cramped chromatin regulator homolog 1		GO:0005634 nucleus;GO:0043231 intracellular membrane-bounded organelle;GO:0043229 intracellular organelle		GO:0003677 DNA binding;GO:0003676 nucleic acid binding;GO:1901363 heterocyclic compound binding		Transcription factors/Helix-turn-helix domains	Nucleus;Nucleoli				0.0	0.0	0.0	0.0	0.0	0.0	0.0	0.0	0.0	0.0	0.0	0.0	0.0	0.0	0.0	0.0	0.0	0.0	0.0	0.0
ZCCHC11	23318	symbol	9606	23318	Human	ZCCHC11	zinc finger CCHC-type containing 11	GO:0031054 pre-miRNA processing;GO:0035196 production of miRNAs involved in gene silencing by miRNA;GO:0010587 miRNA catabolic process	GO:0005730 nucleolus;GO:0031981 nuclear lumen;GO:0070062 extracellular exosome		GO:0050265 RNA uridylyltransferase activity;GO:0070569 uridylyltransferase activity;GO:0016779 nucleotidyltransferase activity		Enzymes/ENZYME proteins/Transferases	Cytoplasm				1.0	0.0	0.0	0.0	0.0	0.0	0.0	1.0	0.0	0.0	0.0	0.0	0.0	0.0	0.0	0.0	0.0	0.0	0.0	0.0
STAG2	10735	symbol	9606	10735	Human	STAG2	stromal antigen 2	GO:0032876 negative regulation of DNA endoreduplication;GO:0032875 regulation of DNA endoreduplication;GO:0042023 DNA endoreduplication	GO:0000775 chromosome, centromeric region;GO:0098687 chromosomal region;GO:0000785 chromatin	[GO:0003674] molecular_function;[GO:0005575] cellular_component;[GO:0005622] intracellular;[GO:0005623] cell;[GO:0005694] chromosome;[GO:0043226] organelle;[GO:0007059] chromosome segregation;[GO:0051276] chromosome organization;[GO:0008150] biological_process;[GO:0000003] reproduction;[GO:0007049] cell cycle;[GO:0005730] nucleolus;[GO:0005654] nucleoplasm;[GO:0005634] nucleus;[GO:0005737] cytopl…	GO:0005515 protein binding;GO:0005488 binding;GO:0003674 molecular_function			Nucleus;Cytoskeleton (Actin filaments);Cytoskeleton (Intermediate filaments)		(M129)PID PLK1 PATHWAY		0.0	0.0	0.0	0.0	0.0	0.0	0.0	0.0	0.0	0.0	0.0	0.0	0.0	0.0	0.0	0.0	0.0	0.0	0.0	0.0
VHL	7428	symbol	9606	7428	Human	VHL	von Hippel-Lindau tumor suppressor	GO:0061428 negative regulation of transcription from RNA polymerase II promoter in response to hypoxia;GO:0097201 negative regulation of transcription from RNA polymerase II promoter in response to stress;GO:0061418 regulation of transcription from RNA polymerase II promoter in response to hypoxia	GO:0030891 VCB complex;GO:0000153 cytoplasmic ubiquitin ligase complex;GO:0000151 ubiquitin ligase complex	[GO:0006950] response to stress;[GO:0003674] molecular_function;[GO:0005634] nucleus;[GO:0005739] mitochondrion;[GO:0043226] organelle;[GO:0005654] nucleoplasm;[GO:0005623] cell;[GO:0043234] protein complex;[GO:0005737] cytoplasm;[GO:0000902] cell morphogenesis;[GO:0048856] anatomical structure development;[GO:0005575] cellular_component;[GO:0005622] intracellular;[GO:0034641] cellular nitrogen c…	GO:0061630 ubiquitin protein ligase activity;GO:0061659 ubiquitin-like protein ligase activity;GO:0004842 ubiquitin-protein transferase activity			Nucleus but not nucleoli		(M180)PID HIF1A PATHWAY; (M44)PID HIF2PATHWAY	(M5891)HALLMARK HYPOXIA	0.0	1.0	0.0	0.0	0.0	0.0	0.0	0.0	0.0	0.0	0.0	1.0	0.0	0.0	0.0	0.0	0.0	0.0	0.0	0.0
WHSC2	7469	gene_synonym	9606	7469	Human	NELFA	negative elongation factor complex member A	GO:0034244 negative regulation of transcription elongation from RNA polymerase II promoter;GO:0032785 negative regulation of DNA-templated transcription, elongation;GO:0034243 regulation of transcription elongation from RNA polymerase II promoter	GO:0032021 NELF complex;GO:0008023 transcription elongation factor complex;GO:0044451 nucleoplasm part		GO:0005515 protein binding;GO:0005488 binding;GO:0003674 molecular_function			Nucleus but not nucleoli				0.0	0.0	0.0	0.0	0.0	1.0	0.0	0.0	0.0	0.0	0.0	0.0	0.0	0.0	0.0	0.0	0.0	0.0	0.0	0.0
DLGAP1	9229	symbol	9606	9229	Human	DLGAP1	discs large homolog associated protein 1	GO:0007268 synaptic transmission;GO:0099537 trans-synaptic signaling;GO:0099536 synaptic signaling	GO:0097481 neuronal postsynaptic density;GO:0045211 postsynaptic membrane;GO:0014069 postsynaptic density		GO:0019904 protein domain specific binding;GO:0032403 protein complex binding;GO:0044877 macromolecular complex binding							0.0	0.0	0.0	0.0	0.0	0.0	0.0	0.0	0.0	0.0	0.0	0.0	0.0	0.0	0.0	0.0	0.0	0.0	0.0	0.0
EVI2A	2123	symbol	9606	2123	Human	EVI2A	ecotropic viral integration site 2A	GO:0007165 signal transduction;GO:0007154 cell communication;GO:0044700 single organism signaling	GO:0016021 integral component of membrane;GO:0031224 intrinsic component of membrane;GO:0044425 membrane part		GO:0004888 transmembrane signaling receptor activity;GO:0099600 transmembrane receptor activity;GO:0038023 signaling receptor activity							0.0	0.0	0.0	0.0	0.0	0.0	0.0	0.0	0.0	0.0	0.0	0.0	0.0	0.0	0.0	0.0	0.0	0.0	0.0	0.0
TMEM199	147007	symbol	9606	147007	Human	TMEM199	transmembrane protein 199		GO:0030663 COPI-coated vesicle membrane;GO:0030137 COPI-coated vesicle;GO:0030660 Golgi-associated vesicle membrane		GO:0005515 protein binding;GO:0005488 binding;GO:0003674 molecular_function							0.0	0.0	0.0	0.0	0.0	0.0	0.0	0.0	0.0	0.0	0.0	0.0	0.0	0.0	0.0	0.0	0.0	0.0	0.0	0.0
HSD17B12	51144	symbol	9606	51144	Human	HSD17B12	hydroxysteroid (17-beta) dehydrogenase 12	GO:0006703 estrogen biosynthetic process;GO:0035338 long-chain fatty-acyl-CoA biosynthetic process;GO:0046949 fatty-acyl-CoA biosynthetic process	GO:0005789 endoplasmic reticulum membrane;GO:0005578 proteinaceous extracellular matrix;GO:0044432 endoplasmic reticulum part		GO:0004303 estradiol 17-beta-dehydrogenase activity;GO:0033764 steroid dehydrogenase activity, acting on the CH-OH group of donors, NAD or NADP as acceptor;GO:0016229 steroid dehydrogenase activity		Enzymes/ENZYME proteins/Oxidoreductases					0.0	0.0	0.0	0.0	0.0	0.0	0.0	0.0	0.0	0.0	0.0	0.0	0.0	0.0	0.0	0.0	0.0	0.0	0.0	0.0
TSC2	7249	symbol	9606	7249	Human	TSC2	tuberous sclerosis 2	GO:0046627 negative regulation of insulin receptor signaling pathway;GO:0001843 neural tube closure;GO:0014067 negative regulation of phosphatidylinositol 3-kinase signaling	GO:0033596 TSC1-TSC2 complex;GO:0044445 cytosolic part;GO:0005764 lysosome		GO:0005096 GTPase activator activity;GO:0031267 small GTPase binding;GO:0030695 GTPase regulator activity		Cytoskeleton related proteins	Cytoplasm		(M199)PID P38 MK2 PATHWAY; (M87)PID LKB1 PATHWAY; (M254)PID MYC REPRESS PATHWAY	(M5923)HALLMARK PI3K AKT MTOR SIGNALING; (M5909)HALLMARK MYOGENESIS	1.0	0.0	0.0	1.0	1.0	0.0	0.0	0.0	0.0	0.0	0.0	1.0	0.0	1.0	0.0	0.0	0.0	1.0	0.0	0.0
RBFOX1	54715	symbol	9606	54715	Human	RBFOX1	RNA binding protein, fox-1 homolog 1	GO:0000381 regulation of alternative mRNA splicing, via spliceosome;GO:0000380 alternative mRNA splicing, via spliceosome;GO:0048024 regulation of mRNA splicing, via spliceosome	GO:0005802 trans-Golgi network;GO:0098791 Golgi subcompartment;GO:0031984 organelle subcompartment		GO:0003729 mRNA binding;GO:0008022 protein C-terminus binding;GO:0044822 poly(A) RNA binding			Nucleus				0.0	0.0	0.0	0.0	0.0	0.0	0.0	0.0	0.0	0.0	0.0	0.0	0.0	0.0	0.0	1.0	0.0	0.0	0.0	0.0
KCNN4	3783	symbol	9606	3783	Human	KCNN4	potassium calcium-activated channel subfamily N member 4	GO:0050862 positive regulation of T cell receptor signaling pathway;GO:0050857 positive regulation of antigen receptor-mediated signaling pathway;GO:0071435 potassium ion export	GO:0008076 voltage-gated potassium channel complex;GO:0034705 potassium channel complex;GO:0034703 cation channel complex		GO:0022894 Intermediate conductance calcium-activated potassium channel activity;GO:0016286 small conductance calcium-activated potassium channel activity;GO:0015269 calcium-activated potassium channel activity		Transporters/Transporter channels and pores;Voltage-gated ion channels/Calcium-Activated Potassium Channels	Nucleus	Enflurane (Protein phosphatase binding);Clotrimazole (Protein phosphatase binding);Quinine (Protein phosphatase binding);Miconazole (Protein phosphatase binding);Halothane (Protein phosphatase binding)		(M5953)HALLMARK KRAS SIGNALING UP	1.0	0.0	1.0	0.0	0.0	0.0	1.0	0.0	0.0	0.0	0.0	0.0	0.0	1.0	0.0	0.0	0.0	0.0	0.0	0.0
GMEB1	10691	symbol	9606	10691	Human	GMEB1	glucocorticoid modulatory element binding protein 1	GO:0045944 positive regulation of transcription from RNA polymerase II promoter;GO:0045893 positive regulation of transcription, DNA-templated;GO:0006357 regulation of transcription from RNA polymerase II promoter	GO:0005654 nucleoplasm;GO:0031981 nuclear lumen;GO:0044428 nuclear part	[GO:0005622] intracellular;[GO:0005575] cellular_component;[GO:0034641] cellular nitrogen compound metabolic process;[GO:0008150] biological_process;[GO:0009058] biosynthetic process;[GO:0005654] nucleoplasm;[GO:0005634] nucleus;[GO:0043226] organelle;[GO:0005737] cytoplasm;[GO:0005623] cell;[GO:0043167] ion binding;[GO:0000988] transcription factor activity, protein binding;[GO:0003674] molecula…	GO:0000978 RNA polymerase II core promoter proximal region sequence-specific DNA binding;GO:0000987 core promoter proximal region sequence-specific DNA binding;GO:0000977 RNA polymerase II regulatory region sequence-specific DNA binding		Transcription factors	Nucleus but not nucleoli				0.0	0.0	0.0	0.0	0.0	0.0	0.0	0.0	0.0	0.0	0.0	0.0	0.0	0.0	0.0	0.0	0.0	0.0	0.0	0.0
RHOF	54509	symbol	9606	54509	Human	RHOF	ras homolog family member F (in filopodia)	GO:0051056 regulation of small GTPase mediated signal transduction;GO:0007015 actin filament organization;GO:0030036 actin cytoskeleton organization	GO:0005856 cytoskeleton;GO:0070062 extracellular exosome;GO:0005829 cytosol	[GO:0005737] cytoplasm;[GO:0005623] cell;[GO:0005829] cytosol;[GO:0005886] plasma membrane;[GO:0005856] cytoskeleton;[GO:0043226] organelle;[GO:0003674] molecular_function;[GO:0007010] cytoskeleton organization;[GO:0006913] nucleocytoplasmic transport;[GO:0008150] biological_process;[GO:0006810] transport;[GO:0007165] signal transduction;[GO:0003924] GTPase activity;[GO:0005576] extracellular reg…	GO:0003924 GTPase activity;GO:0005525 GTP binding;GO:0032561 guanyl ribonucleotide binding		Cytoskeleton related proteins	Nucleoli;Cytoplasm			(M5915)HALLMARK APICAL JUNCTION; (M5893)HALLMARK MITOTIC SPINDLE	0.0	0.0	0.0	0.0	0.0	0.0	0.0	0.0	0.0	0.0	0.0	0.0	0.0	0.0	0.0	0.0	0.0	0.0	0.0	0.0
LST1	7940	symbol	9606	7940	Human	LST1	leukocyte specific transcript 1	GO:0050672 negative regulation of lymphocyte proliferation;GO:0016358 dendrite development;GO:0032945 negative regulation of mononuclear cell proliferation	GO:0000139 Golgi membrane;GO:0044431 Golgi apparatus part;GO:0005794 Golgi apparatus	[GO:0008150] biological_process;[GO:0048856] anatomical structure development;[GO:0000902] cell morphogenesis;[GO:0005737] cytoplasm;[GO:0005794] Golgi apparatus;[GO:0005575] cellular_component;[GO:0005623] cell;[GO:0005622] intracellular;[GO:0043226] organelle;[GO:0008283] cell proliferation;[GO:0030154] cell differentiation;[GO:0002376] immune system process;[GO:0005575] cellular_component;[GO:…								0.0	0.0	0.0	0.0	0.0	0.0	0.0	0.0	0.0	0.0	0.0	1.0	0.0	0.0	0.0	0.0	0.0	0.0	1.0	0.0
TMC7	79905	symbol	9606	79905	Human	TMC7	transmembrane channel like 7	GO:0006811 ion transport;GO:0044765 single-organism transport;GO:0006810 transport	GO:0016021 integral component of membrane;GO:0031224 intrinsic component of membrane;GO:0044425 membrane part					Vesicles				0.0	0.0	0.0	0.0	0.0	0.0	0.0	0.0	0.0	0.0	0.0	0.0	0.0	0.0	0.0	0.0	0.0	0.0	0.0	0.0
KIAA0195	9772	gene_synonym	9606	9772	Human	TMEM94	transmembrane protein 94		GO:0005654 nucleoplasm;GO:0031981 nuclear lumen;GO:0044428 nuclear part					Nucleus but not nucleoli				0.0	0.0	0.0	0.0	0.0	0.0	0.0	0.0	0.0	0.0	0.0	0.0	0.0	0.0	0.0	0.0	0.0	0.0	0.0	0.0
CLCN7	1186	symbol	9606	1186	Human	CLCN7	chloride voltage-gated channel 7	GO:1903959 regulation of anion transmembrane transport;GO:1902476 chloride transmembrane transport;GO:0006821 chloride transport	GO:0005765 lysosomal membrane;GO:0098852 lytic vacuole membrane;GO:0005774 vacuolar membrane	[GO:0005575] cellular_component;[GO:0005622] intracellular;[GO:0043226] organelle;[GO:0005623] cell;[GO:0005737] cytoplasm;[GO:0005773] vacuole;[GO:0003674] molecular_function;[GO:0022857] transmembrane transporter activity;[GO:0043167] ion binding;[GO:0008150] biological_process;[GO:0006810] transport;[GO:0055085] transmembrane transport;[GO:0005764] lysosome	GO:0005247 voltage-gated chloride channel activity;GO:0008308 voltage-gated anion channel activity;GO:0005254 chloride channel activity		Transporters/Electrochemical Potential-driven transporters	Nucleus but not nucleoli				0.0	0.0	1.0	0.0	0.0	0.0	0.0	0.0	0.0	0.0	0.0	0.0	0.0	0.0	0.0	0.0	0.0	0.0	0.0	0.0
TSC1	7248	symbol	9606	7248	Human	TSC1	tuberous sclerosis 1	GO:0043379 memory T cell differentiation;GO:0006407 rRNA export from nucleus;GO:0051894 positive regulation of focal adhesion assembly	GO:0033596 TSC1-TSC2 complex;GO:0005884 actin filament;GO:0005938 cell cortex		GO:0032794 GTPase activating protein binding;GO:0051087 chaperone binding;GO:0030695 GTPase regulator activity		Cytoskeleton related proteins	Cytoplasm		(M87)PID LKB1 PATHWAY; (M295)SIG PIP3 SIGNALING IN CARDIAC MYOCTES; (M121)PID MTOR 4PATHWAY	(M5915)HALLMARK APICAL JUNCTION; (M5893)HALLMARK MITOTIC SPINDLE	1.0	1.0	1.0	1.0	1.0	0.0	0.0	1.0	0.0	0.0	0.0	1.0	1.0	1.0	0.0	0.0	0.0	0.0	0.0	0.0
NPRL3	8131	symbol	9606	8131	Human	NPRL3	NPR3 like, GATOR1 complex subunit	GO:0035909 aorta morphogenesis;GO:0035904 aorta development;GO:0003281 ventricular septum development	GO:1990130 Iml1 complex;GO:0035859 Seh1-associated complex;GO:0043234 protein complex		GO:0005096 GTPase activator activity;GO:0030695 GTPase regulator activity;GO:0060589 nucleoside-triphosphatase regulator activity			Cytoplasm				1.0	1.0	0.0	1.0	1.0	0.0	0.0	0.0	0.0	0.0	0.0	1.0	0.0	0.0	0.0	0.0	0.0	0.0	0.0	0.0
C10orf54	64115	symbol	9606	64115	Human	C10orf54	chromosome 10 open reading frame 54	GO:2000562 negative regulation of CD4-positive, alpha-beta T cell proliferation;GO:2000561 regulation of CD4-positive, alpha-beta T cell proliferation;GO:0046642 negative regulation of alpha-beta T cell proliferation	GO:0009897 external side of plasma membrane;GO:0005911 cell-cell junction;GO:0098552 side of membrane					Nucleus but not nucleoli				0.0	0.0	0.0	0.0	1.0	0.0	0.0	0.0	0.0	0.0	0.0	1.0	0.0	0.0	0.0	0.0	0.0	0.0	1.0	0.0
ATP6AP1	537	symbol	9606	537	Human	ATP6AP1	ATPase H+ transporting accessory protein 1	GO:2001206 positive regulation of osteoclast development;GO:2001204 regulation of osteoclast development;GO:0045672 positive regulation of osteoclast differentiation	GO:0033180 proton-transporting V-type ATPase, V1 domain;GO:0033178 proton-transporting two-sector ATPase complex, catalytic domain;GO:0033176 proton-transporting V-type ATPase complex		GO:0046961 proton-transporting ATPase activity, rotational mechanism;GO:0046933 proton-transporting ATP synthase activity, rotational mechanism;GO:0036442 hydrogen-exporting ATPase activity			Plasma membrane;Cytoplasm;Cytoskeleton (Microtubules)			(M5909)HALLMARK MYOGENESIS; (M5936)HALLMARK OXIDATIVE PHOSPHORYLATION	1.0	0.0	1.0	0.0	0.0	0.0	0.0	0.0	1.0	0.0	0.0	0.0	0.0	1.0	0.0	0.0	1.0	0.0	0.0	0.0
SUPT16H	11198	symbol	9606	11198	Human	SUPT16H	SPT16 homolog, facilitates chromatin remodeling subunit	GO:0032786 positive regulation of DNA-templated transcription, elongation;GO:0050434 positive regulation of viral transcription;GO:0006337 nucleosome disassembly	GO:0005694 chromosome;GO:0005654 nucleoplasm;GO:0031981 nuclear lumen		GO:0044822 poly(A) RNA binding;GO:0003723 RNA binding;GO:0003676 nucleic acid binding		Enzymes/Peptidases/Metallopeptidases	Nucleus				0.0	0.0	0.0	0.0	0.0	1.0	0.0	0.0	0.0	0.0	0.0	0.0	0.0	0.0	0.0	0.0	0.0	0.0	0.0	0.0
CLN3	1201	symbol	9606	1201	Human	CLN3	ceroid-lipofuscinosis, neuronal 3	GO:0035752 lysosomal lumen pH elevation;GO:0007042 lysosomal lumen acidification;GO:0007035 vacuolar acidification	GO:0008021 synaptic vesicle;GO:0005901 caveola;GO:0030176 integral component of endoplasmic reticulum membrane		GO:0051082 unfolded protein binding;GO:0005515 protein binding;GO:0005488 binding							1.0	0.0	0.0	0.0	0.0	0.0	0.0	0.0	0.0	0.0	0.0	0.0	1.0	0.0	0.0	0.0	0.0	0.0	0.0	0.0
ANKRD54	129138	symbol	9606	129138	Human	ANKRD54	ankyrin repeat domain 54	GO:0045648 positive regulation of erythrocyte differentiation;GO:0045646 regulation of erythrocyte differentiation;GO:0045639 positive regulation of myeloid cell differentiation	GO:0030496 midbody;GO:0005634 nucleus;GO:0043231 intracellular membrane-bounded organelle		GO:0019887 protein kinase regulator activity;GO:0019207 kinase regulator activity;GO:0032403 protein complex binding			Nucleus but not nucleoli				0.0	0.0	0.0	0.0	0.0	0.0	0.0	0.0	1.0	0.0	0.0	0.0	0.0	1.0	0.0	0.0	0.0	0.0	0.0	0.0
ANKS1B	56899	symbol	9606	56899	Human	ANKS1B	ankyrin repeat and sterile alpha motif domain containing 1B		GO:0015030 Cajal body;GO:0016604 nuclear body;GO:0045211 postsynaptic membrane		GO:0046875 ephrin receptor binding;GO:0005102 receptor binding;GO:0005515 protein binding			Cytoplasm				0.0	0.0	0.0	0.0	0.0	0.0	0.0	0.0	0.0	0.0	0.0	0.0	0.0	0.0	0.0	0.0	0.0	0.0	0.0	0.0
HIRA	7290	symbol	9606	7290	Human	HIRA	histone cell cycle regulator	GO:0006336 DNA replication-independent nucleosome assembly;GO:0034724 DNA replication-independent nucleosome organization;GO:0006334 nucleosome assembly	GO:0016605 PML body;GO:0000790 nuclear chromatin;GO:0016604 nuclear body		GO:0003714 transcription corepressor activity;GO:0003712 transcription cofactor activity;GO:0000989 transcription factor activity, transcription factor binding			Nucleus but not nucleoli			(M5901)HALLMARK G2M CHECKPOINT	0.0	0.0	0.0	0.0	0.0	0.0	0.0	0.0	0.0	0.0	0.0	0.0	0.0	0.0	0.0	0.0	1.0	0.0	0.0	0.0
CSMD1	64478	symbol	9606	64478	Human	CSMD1	CUB and Sushi multiple domains 1		GO:0016021 integral component of membrane;GO:0031224 intrinsic component of membrane;GO:0044425 membrane part					Vesicles				0.0	0.0	0.0	0.0	0.0	0.0	0.0	0.0	0.0	0.0	0.0	0.0	0.0	0.0	0.0	0.0	0.0	0.0	0.0	0.0
JSRP1	126306	symbol	9606	126306	Human	JSRP1	junctional sarcoplasmic reticulum protein 1	GO:0060314 regulation of ryanodine-sensitive calcium-release channel activity;GO:0051279 regulation of release of sequestered calcium ion into cytosol;GO:0051209 release of sequestered calcium ion into cytosol	GO:0033017 sarcoplasmic reticulum membrane;GO:0016529 sarcoplasmic reticulum;GO:0016528 sarcoplasm					Endoplasmic reticulum				1.0	0.0	1.0	0.0	0.0	0.0	0.0	0.0	1.0	0.0	0.0	0.0	0.0	0.0	0.0	0.0	0.0	0.0	0.0	0.0
c12orf11	55726	gene_synonym	9606	55726	Human	ASUN	asunder, spermatogenesis regulator	GO:0007052 mitotic spindle organization;GO:0007051 spindle organization;GO:0090435 protein localization to nuclear envelope	GO:0005634 nucleus;GO:0043231 intracellular membrane-bounded organelle;GO:0005737 cytoplasm		GO:0005515 protein binding;GO:0005488 binding;GO:0003674 molecular_function			Nucleus but not nucleoli				0.0	0.0	0.0	0.0	0.0	0.0	0.0	0.0	0.0	0.0	0.0	0.0	0.0	1.0	0.0	0.0	0.0	0.0	0.0	0.0
RANBP17	64901	symbol	9606	64901	Human	RANBP17	RAN binding protein 17	GO:0006611 protein export from nucleus;GO:0006606 protein import into nucleus;GO:0051028 mRNA transport	GO:0005643 nuclear pore;GO:0005635 nuclear envelope;GO:0031967 organelle envelope	[GO:0005575] cellular_component;[GO:0008565] protein transporter activity;[GO:0005622] intracellular;[GO:0043167] ion binding;[GO:0006605] protein targeting;[GO:0006810] transport;[GO:0006913] nucleocytoplasmic transport;[GO:0019899] enzyme binding;[GO:0008150] biological_process;[GO:0005623] cell;[GO:0005634] nucleus;[GO:0005635] nuclear envelope;[GO:0043226] organelle;[GO:0005737] cytoplasm;[GO…	GO:0005049 nuclear export signal receptor activity;GO:0008536 Ran GTPase binding;GO:0005487 nucleocytoplasmic transporter activity			Nucleus				0.0	0.0	0.0	0.0	0.0	0.0	0.0	0.0	0.0	0.0	0.0	0.0	0.0	1.0	0.0	0.0	0.0	0.0	0.0	0.0
NFYC	4802	symbol	9606	4802	Human	NFYC	nuclear transcription factor Y subunit gamma	GO:0045944 positive regulation of transcription from RNA polymerase II promoter;GO:0045893 positive regulation of transcription, DNA-templated;GO:0006357 regulation of transcription from RNA polymerase II promoter	GO:0016602 CCAAT-binding factor complex;GO:0090575 RNA polymerase II transcription factor complex;GO:0044798 nuclear transcription factor complex		GO:0000978 RNA polymerase II core promoter proximal region sequence-specific DNA binding;GO:0000987 core promoter proximal region sequence-specific DNA binding;GO:0000977 RNA polymerase II regulatory region sequence-specific DNA binding		Transcription factors/Other all-alpha-helical DNA-binding domains	Nucleus but not nucleoli		(M254)PID MYC REPRESS PATHWAY; (M145)PID P53 DOWNSTREAM PATHWAY	(M5924)HALLMARK MTORC1 SIGNALING	0.0	0.0	0.0	0.0	0.0	0.0	0.0	0.0	0.0	0.0	0.0	0.0	0.0	0.0	0.0	0.0	0.0	1.0	0.0	0.0
TH1L	51497	gene_synonym	9606	51497	Human	NELFCD	negative elongation factor complex member C/D	GO:0050434 positive regulation of viral transcription;GO:0046782 regulation of viral transcription;GO:0006368 transcription elongation from RNA polymerase II promoter	GO:0032021 NELF complex;GO:0008023 transcription elongation factor complex;GO:0044451 nucleoplasm part		GO:0005515 protein binding;GO:0005488 binding;GO:0003674 molecular_function			Nucleus but not nucleoli			(M5898)HALLMARK DNA REPAIR	0.0	0.0	0.0	0.0	0.0	1.0	0.0	0.0	0.0	0.0	0.0	0.0	0.0	0.0	0.0	0.0	0.0	0.0	0.0	0.0
EIF3L	51386	symbol	9606	51386	Human	EIF3L	eukaryotic translation initiation factor 3 subunit L	GO:0001731 formation of translation preinitiation complex;GO:0006446 regulation of translational initiation;GO:0006413 translational initiation	GO:0001650 fibrillar center;GO:0016282 eukaryotic 43S preinitiation complex;GO:0033290 eukaryotic 48S preinitiation complex		GO:0003743 translation initiation factor activity;GO:0008135 translation factor activity, RNA binding;GO:0044822 poly(A) RNA binding			Nucleoli				0.0	0.0	0.0	0.0	0.0	0.0	0.0	1.0	0.0	0.0	0.0	0.0	0.0	0.0	0.0	0.0	0.0	0.0	0.0	0.0
PPP1R9A	55607	symbol	9606	55607	Human	PPP1R9A	protein phosphatase 1 regulatory subunit 9A	GO:1904049 negative regulation of spontaneous neurotransmitter secretion;GO:1900454 positive regulation of long term synaptic depression;GO:1900272 negative regulation of long-term synaptic potentiation	GO:0044326 dendritic spine neck;GO:1990761 growth cone lamellipodium;GO:0030864 cortical actin cytoskeleton		GO:0008157 protein phosphatase 1 binding;GO:0051015 actin filament binding;GO:0019903 protein phosphatase binding		Cytoskeleton related proteins	Nucleus but not nucleoli;Cytoplasm				0.0	0.0	0.0	0.0	0.0	0.0	0.0	0.0	0.0	0.0	0.0	0.0	0.0	0.0	0.0	0.0	0.0	0.0	0.0	0.0
OSBP2	23762	symbol	9606	23762	Human	OSBP2	oxysterol binding protein 2	GO:0007286 spermatid development;GO:0048515 spermatid differentiation;GO:0007281 germ cell development	GO:0097440 apical dendrite;GO:0030425 dendrite;GO:0036477 somatodendritic compartment	[GO:0003674] molecular_function;[GO:0008289] lipid binding;[GO:0005575] cellular_component;[GO:0006810] transport;[GO:0008150] biological_process;[GO:0005623] cell;[GO:0000003] reproduction;[GO:0030154] cell differentiation;[GO:0048856] anatomical structure development	GO:0015485 cholesterol binding;GO:0032934 sterol binding;GO:0005496 steroid binding			Cytoplasm			(M5945)HALLMARK HEME METABOLISM	0.0	0.0	0.0	0.0	0.0	0.0	0.0	0.0	0.0	0.0	0.0	0.0	0.0	0.0	0.0	0.0	0.0	0.0	0.0	0.0
ATRNL1	26033	symbol	9606	26033	Human	ATRNL1	attractin like 1	GO:0007186 G-protein coupled receptor signaling pathway;GO:0007165 signal transduction;GO:0007154 cell communication	GO:0016021 integral component of membrane;GO:0031224 intrinsic component of membrane;GO:0044425 membrane part	[GO:0005575] cellular_component;[GO:0003674] molecular_function;[GO:0007165] signal transduction;[GO:0008150] biological_process	GO:0030246 carbohydrate binding;GO:0005488 binding;GO:0003674 molecular_function			Nucleus;Mitochondria				0.0	0.0	0.0	0.0	0.0	0.0	0.0	0.0	0.0	0.0	0.0	0.0	0.0	0.0	0.0	0.0	0.0	0.0	0.0	0.0
RNASEK	440400	symbol	9606	440400	Human	RNASEK	ribonuclease K	GO:0009303 rRNA transcription;GO:0098781 ncRNA transcription;GO:0090502 RNA phosphodiester bond hydrolysis, endonucleolytic	GO:0016021 integral component of membrane;GO:0031224 intrinsic component of membrane;GO:0044425 membrane part		GO:0004521 endoribonuclease activity;GO:0004540 ribonuclease activity;GO:0004519 endonuclease activity							0.0	0.0	0.0	0.0	0.0	0.0	0.0	0.0	0.0	0.0	0.0	0.0	0.0	0.0	0.0	0.0	0.0	0.0	0.0	0.0
CDH12	1010	symbol	9606	1010	Human	CDH12	cadherin 12	GO:0034332 adherens junction organization;GO:0007156 homophilic cell adhesion via plasma membrane adhesion molecules;GO:0098742 cell-cell adhesion via plasma-membrane adhesion molecules	GO:0016021 integral component of membrane;GO:0005886 plasma membrane;GO:0031224 intrinsic component of membrane		GO:0005509 calcium ion binding;GO:0046872 metal ion binding;GO:0043169 cation binding			Vesicles				0.0	0.0	0.0	0.0	0.0	0.0	0.0	0.0	0.0	0.0	0.0	0.0	0.0	0.0	0.0	0.0	0.0	0.0	0.0	0.0
LIN28B	389421	symbol	9606	389421	Human	LIN28B	lin-28 homolog B	GO:0031054 pre-miRNA processing;GO:0035196 production of miRNAs involved in gene silencing by miRNA;GO:0010587 miRNA catabolic process	GO:0005730 nucleolus;GO:0031981 nuclear lumen;GO:0044428 nuclear part		GO:0008270 zinc ion binding;GO:0044822 poly(A) RNA binding;GO:0046914 transition metal ion binding			Nucleus;Nucleoli		(M66)PID MYC ACTIV PATHWAY		1.0	0.0	0.0	0.0	0.0	0.0	0.0	1.0	0.0	0.0	0.0	0.0	0.0	0.0	0.0	0.0	0.0	0.0	0.0	0.0
PLEKHA2	59339	symbol	9606	59339	Human	PLEKHA2	pleckstrin homology domain containing A2	GO:0001954 positive regulation of cell-matrix adhesion;GO:0001952 regulation of cell-matrix adhesion;GO:0010811 positive regulation of cell-substrate adhesion	GO:0005634 nucleus;GO:0005886 plasma membrane;GO:0043234 protein complex		GO:0043236 laminin binding;GO:0001968 fibronectin binding;GO:0050840 extracellular matrix binding					(M141)PID PI3KCI PATHWAY		0.0	0.0	0.0	0.0	0.0	0.0	0.0	0.0	0.0	0.0	0.0	0.0	0.0	0.0	0.0	0.0	0.0	0.0	0.0	0.0
GLDC	2731	symbol	9606	2731	Human	GLDC	glycine decarboxylase	GO:0019464 glycine decarboxylation via glycine cleavage system;GO:0006546 glycine catabolic process;GO:0009071 serine family amino acid catabolic process	GO:0005960 glycine cleavage complex;GO:1990204 oxidoreductase complex;GO:0005759 mitochondrial matrix		GO:0004375 glycine dehydrogenase (decarboxylating) activity;GO:0016642 oxidoreductase activity, acting on the CH-NH2 group of donors, disulfide as acceptor;GO:0016594 glycine binding		Enzymes/ENZYME proteins/Oxidoreductases;Mitochondrial proteins	Mitochondria	Pyridoxal Phosphate (Lyase activity);Glycine (Lyase activity)		(M5892)HALLMARK CHOLESTEROL HOMEOSTASIS	0.0	0.0	0.0	0.0	0.0	0.0	0.0	0.0	0.0	0.0	1.0	0.0	0.0	0.0	0.0	0.0	0.0	0.0	0.0	0.0
UNK	85451	symbol	9606	85451	Human	UNK	unkempt family zinc finger	GO:2000766 negative regulation of cytoplasmic translation;GO:2000765 regulation of cytoplasmic translation;GO:0002181 cytoplasmic translation	GO:0005844 polysome;GO:0030529 intracellular ribonucleoprotein complex;GO:1990904 ribonucleoprotein complex		GO:1990715 mRNA CDS binding;GO:0003729 mRNA binding;GO:0008270 zinc ion binding			Cytoplasm				0.0	0.0	0.0	0.0	0.0	0.0	0.0	1.0	0.0	0.0	0.0	0.0	0.0	0.0	0.0	0.0	0.0	0.0	0.0	0.0
ENPEP	2028	symbol	9606	2028	Human	ENPEP	glutamyl aminopeptidase	GO:0002005 angiotensin catabolic process in blood;GO:0002003 angiotensin maturation;GO:0002002 regulation of angiotensin levels in blood	GO:0005765 lysosomal membrane;GO:0098852 lytic vacuole membrane;GO:0005774 vacuolar membrane		GO:0070006 metalloaminopeptidase activity;GO:0004177 aminopeptidase activity;GO:0008235 metalloexopeptidase activity		CD markers;Enzymes/{ENZYME proteins/Hydrolases,Peptidases/Metallopeptidases}		L-Glutamic Acid (Zinc ion binding)		(M5934)HALLMARK XENOBIOTIC METABOLISM	0.0	0.0	0.0	0.0	1.0	0.0	0.0	0.0	0.0	0.0	0.0	0.0	0.0	0.0	1.0	0.0	0.0	0.0	0.0	0.0
PCSK5	5125	symbol	9606	5125	Human	PCSK5	proprotein convertase subtilisin/kexin type 5	GO:0002001 renin secretion into blood stream;GO:0001999 renal response to blood flow involved in circulatory renin-angiotensin regulation of systemic arterial blood pressure;GO:0001991 regulation of systemic arterial blood pressure by circulatory renin-angiotensin	GO:0005796 Golgi lumen;GO:0030141 secretory granule;GO:0099503 secretory vesicle		GO:0004252 serine-type endopeptidase activity;GO:0008236 serine-type peptidase activity;GO:0004175 endopeptidase activity		Enzymes/Peptidases/Serine-type peptidases	Golgi apparatus		(M3468)NABA ECM REGULATORS; (M5885)NABA MATRISOME ASSOCIATED; (M5889)NABA MATRISOME		1.0	1.0	0.0	0.0	1.0	0.0	0.0	0.0	0.0	0.0	0.0	0.0	0.0	0.0	1.0	0.0	0.0	0.0	0.0	0.0
CPVL	54504	symbol	9606	54504	Human	CPVL	carboxypeptidase, vitellogenic like	GO:0051603 proteolysis involved in cellular protein catabolic process;GO:0044257 cellular protein catabolic process;GO:0030163 protein catabolic process	GO:0070062 extracellular exosome;GO:1903561 extracellular vesicle;GO:0043230 extracellular organelle		GO:0004185 serine-type carboxypeptidase activity;GO:0070008 serine-type exopeptidase activity;GO:0004180 carboxypeptidase activity		Enzymes/Peptidases/Serine-type peptidases	Endoplasmic reticulum				0.0	0.0	0.0	0.0	0.0	0.0	0.0	0.0	0.0	0.0	0.0	0.0	0.0	0.0	0.0	0.0	0.0	0.0	0.0	0.0
GON4L	54856	symbol	9606	54856	Human	GON4L	gon-4 like	GO:0006355 regulation of transcription, DNA-templated;GO:1903506 regulation of nucleic acid-templated transcription;GO:0006351 transcription, DNA-templated	GO:0005634 nucleus;GO:0043231 intracellular membrane-bounded organelle;GO:0043229 intracellular organelle		GO:0003677 DNA binding;GO:0003676 nucleic acid binding;GO:1901363 heterocyclic compound binding							0.0	0.0	0.0	0.0	0.0	0.0	0.0	0.0	0.0	0.0	0.0	0.0	0.0	0.0	0.0	0.0	0.0	0.0	0.0	0.0
ENAH	55740	symbol	9606	55740	Human	ENAH	enabled homolog (Drosophila)	GO:0007411 axon guidance;GO:0050852 T cell receptor signaling pathway;GO:0097485 neuron projection guidance	GO:0030175 filopodium;GO:0005925 focal adhesion;GO:0030027 lamellipodium		GO:0050699 WW domain binding;GO:0017124 SH3 domain binding;GO:0003779 actin binding			Plasma membrane;Cytoplasm;Focal Adhesions		(M156)PID ECADHERIN NASCENT AJ PATHWAY; (M232)PID ECADHERIN STABILIZATION PATHWAY; (M81)PID CDC42 PATHWAY		0.0	0.0	0.0	0.0	0.0	0.0	0.0	0.0	0.0	0.0	0.0	0.0	0.0	1.0	0.0	0.0	0.0	0.0	0.0	0.0
PTPRD	5789	symbol	9606	5789	Human	PTPRD	protein tyrosine phosphatase, receptor type D	GO:0050775 positive regulation of dendrite morphogenesis;GO:1900006 positive regulation of dendrite development;GO:0048814 regulation of dendrite morphogenesis	GO:0005887 integral component of plasma membrane;GO:0031226 intrinsic component of plasma membrane;GO:0070062 extracellular exosome		GO:0005001 transmembrane receptor protein tyrosine phosphatase activity;GO:0019198 transmembrane receptor protein phosphatase activity;GO:0004725 protein tyrosine phosphatase activity		Enzymes/ENZYME proteins/Hydrolases	Vesicles			(M5941)HALLMARK UV RESPONSE UP	0.0	0.0	0.0	0.0	0.0	0.0	0.0	0.0	0.0	0.0	0.0	0.0	0.0	0.0	0.0	0.0	0.0	0.0	0.0	0.0
IFITM3	10410	symbol	9606	10410	Human	IFITM3	interferon induced transmembrane protein 3	GO:0046597 negative regulation of viral entry into host cell;GO:0046596 regulation of viral entry into host cell;GO:0032897 negative regulation of viral transcription	GO:0031902 late endosome membrane;GO:0005765 lysosomal membrane;GO:0098852 lytic vacuole membrane		GO:0005515 protein binding;GO:0005488 binding;GO:0003674 molecular_function						(M5911)HALLMARK INTERFERON ALPHA RESPONSE; (M5902)HALLMARK APOPTOSIS; (M5913)HALLMARK INTERFERON GAMMA RESPONSE	0.0	0.0	0.0	0.0	0.0	1.0	0.0	0.0	0.0	1.0	0.0	0.0	0.0	0.0	0.0	0.0	0.0	0.0	0.0	0.0
RYR3	6263	symbol	9606	6263	Human	RYR3	ryanodine receptor 3	GO:0051209 release of sequestered calcium ion into cytosol;GO:0097553 calcium ion transmembrane import into cytosol;GO:1902656 calcium ion import into cytosol	GO:0033017 sarcoplasmic reticulum membrane;GO:0016529 sarcoplasmic reticulum;GO:0016528 sarcoplasm	[GO:0043167] ion binding;[GO:0022857] transmembrane transporter activity;[GO:0005622] intracellular;[GO:0005575] cellular_component;[GO:0003674] molecular_function;[GO:0005783] endoplasmic reticulum;[GO:0043226] organelle;[GO:0005829] cytosol;[GO:0005623] cell;[GO:0005737] cytoplasm;[GO:0006810] transport;[GO:0008150] biological_process;[GO:0055085] transmembrane transport;[GO:0042592] homeostati…	GO:0005219 ryanodine-sensitive calcium-release channel activity;GO:0015278 calcium-release channel activity;GO:0099604 ligand-gated calcium channel activity							1.0	0.0	1.0	0.0	0.0	0.0	1.0	0.0	1.0	0.0	0.0	0.0	0.0	0.0	1.0	0.0	0.0	0.0	0.0	0.0
KLF16	83855	symbol	9606	83855	Human	KLF16	Kruppel-like factor 16	GO:0000122 negative regulation of transcription from RNA polymerase II promoter;GO:0007212 dopamine receptor signaling pathway;GO:0045892 negative regulation of transcription, DNA-templated	GO:0005634 nucleus;GO:0043231 intracellular membrane-bounded organelle;GO:0043229 intracellular organelle		GO:0000978 RNA polymerase II core promoter proximal region sequence-specific DNA binding;GO:0001078 transcriptional repressor activity, RNA polymerase II core promoter proximal region sequence-specific binding;GO:0000987 core promoter proximal region sequence-specific DNA binding		Transcription factors/Zinc-coordinating DNA-binding domains	Nucleus				0.0	0.0	0.0	0.0	0.0	0.0	0.0	0.0	0.0	0.0	0.0	0.0	0.0	0.0	0.0	0.0	0.0	0.0	0.0	0.0
CNTNAP2	26047	symbol	9606	26047	Human	CNTNAP2	contactin associated protein-like 2	GO:0071109 superior temporal gyrus development;GO:0045163 clustering of voltage-gated potassium channels;GO:0042297 vocal learning	GO:0044224 juxtaparanode region of axon;GO:0030673 axolemma;GO:0008076 voltage-gated potassium channel complex		GO:0019899 enzyme binding;GO:0005515 protein binding;GO:0005488 binding							0.0	0.0	0.0	0.0	0.0	0.0	0.0	0.0	0.0	0.0	0.0	0.0	1.0	0.0	1.0	0.0	0.0	0.0	0.0	0.0
ERBB4	2066	symbol	9606	2066	Human	ERBB4	erb-b2 receptor tyrosine kinase 4	GO:2000366 positive regulation of STAT protein import into nucleus;GO:2000364 regulation of STAT protein import into nucleus;GO:0060045 positive regulation of cardiac muscle cell proliferation	GO:0016323 basolateral plasma membrane;GO:0005759 mitochondrial matrix;GO:0043235 receptor complex		GO:0004716 receptor signaling protein tyrosine kinase activity;GO:0004714 transmembrane receptor protein tyrosine kinase activity;GO:0005154 epidermal growth factor receptor binding	Tyr protein kinase family	Enzymes/{ENZYME proteins/Transferases,Kinases/Tyr protein kinases}		Afatinib (Transmembrane receptor protein tyrosine kinase activity)	(M201)PID ERBB NETWORK PATHWAY; (M13)PID ERBB4 PATHWAY; (M295)SIG PIP3 SIGNALING IN CARDIAC MYOCTES		1.0	0.0	0.0	1.0	1.0	0.0	1.0	0.0	0.0	0.0	0.0	1.0	1.0	1.0	0.0	0.0	0.0	0.0	0.0	0.0
CUL2	8453	symbol	9606	8453	Human	CUL2	cullin 2	GO:0061418 regulation of transcription from RNA polymerase II promoter in response to hypoxia;GO:0043618 regulation of transcription from RNA polymerase II promoter in response to stress;GO:0042787 protein ubiquitination involved in ubiquitin-dependent protein catabolic process	GO:0030891 VCB complex;GO:0031462 Cul2-RING ubiquitin ligase complex;GO:0000153 cytoplasmic ubiquitin ligase complex		GO:0061630 ubiquitin protein ligase activity;GO:0061659 ubiquitin-like protein ligase activity;GO:0031625 ubiquitin protein ligase binding			Nucleus but not nucleoli		(M180)PID HIF1A PATHWAY		0.0	1.0	0.0	0.0	0.0	0.0	0.0	0.0	0.0	0.0	0.0	1.0	0.0	0.0	0.0	0.0	0.0	0.0	0.0	0.0
SH2B1	25970	symbol	9606	25970	Human	SH2B1	SH2B adaptor protein 1	GO:0045840 positive regulation of mitotic nuclear division;GO:0051785 positive regulation of nuclear division;GO:2000278 regulation of DNA biosynthetic process	GO:0005829 cytosol;GO:0005634 nucleus;GO:0044444 cytoplasmic part	[GO:0007165] signal transduction;[GO:0008150] biological_process;[GO:0004871] signal transducer activity;[GO:0005575] cellular_component;[GO:0005622] intracellular;[GO:0003674] molecular_function;[GO:0005623] cell;[GO:0005737] cytoplasm;[GO:0005634] nucleus;[GO:0043226] organelle;[GO:0007049] cell cycle;[GO:0009058] biosynthetic process;[GO:0007067] mitotic nuclear division;[GO:0051301] cell divi…	GO:0035591 signaling adaptor activity;GO:0060090 binding, bridging;GO:0004871 signal transducer activity					(M187)PID TRKR PATHWAY	(M5909)HALLMARK MYOGENESIS	0.0	0.0	0.0	0.0	0.0	0.0	1.0	0.0	0.0	0.0	0.0	0.0	0.0	0.0	0.0	0.0	0.0	0.0	0.0	0.0
CLTC	1213	symbol	9606	1213	Human	CLTC	clathrin heavy chain	GO:1900126 negative regulation of hyaluronan biosynthetic process;GO:1900125 regulation of hyaluronan biosynthetic process;GO:0033572 transferrin transport	GO:0030130 clathrin coat of trans-Golgi network vesicle;GO:0036020 endolysosome membrane;GO:0012510 trans-Golgi network transport vesicle membrane	[GO:0003723] RNA binding;[GO:0002376] immune system process;[GO:0003674] molecular_function;[GO:0030154] cell differentiation;[GO:0007009] plasma membrane organization;[GO:0061024] membrane organization;[GO:0007067] mitotic nuclear division;[GO:0019899] enzyme binding;[GO:0043234] protein complex;[GO:0016192] vesicle-mediated transport;[GO:0043226] organelle;[GO:0005622] intracellular;[GO:0005623…	GO:0032051 clathrin light chain binding;GO:0003725 double-stranded RNA binding;GO:0030276 clathrin binding			Vesicles		(M94)PID FAS PATHWAY; (M67)PID ARF6 TRAFFICKING PATHWAY	(M5910)HALLMARK PROTEIN SECRETION; (M5923)HALLMARK PI3K AKT MTOR SIGNALING	1.0	0.0	1.0	0.0	0.0	0.0	0.0	0.0	0.0	1.0	0.0	0.0	0.0	0.0	0.0	0.0	1.0	0.0	0.0	1.0
DACH2	117154	symbol	9606	117154	Human	DACH2	dachshund family transcription factor 2	GO:0046545 development of primary female sexual characteristics;GO:0046660 female sex differentiation;GO:0045137 development of primary sexual characteristics	GO:0005634 nucleus;GO:0043231 intracellular membrane-bounded organelle;GO:0043229 intracellular organelle		GO:0003677 DNA binding;GO:0003676 nucleic acid binding;GO:1901363 heterocyclic compound binding							0.0	0.0	0.0	0.0	0.0	0.0	0.0	0.0	0.0	0.0	0.0	0.0	0.0	0.0	0.0	0.0	0.0	0.0	0.0	0.0
ATP6V1A	523	symbol	9606	523	Human	ATP6V1A	ATPase H+ transporting V1 subunit A	GO:0015991 ATP hydrolysis coupled proton transport;GO:0033572 transferrin transport;GO:0015988 energy coupled proton transmembrane transport, against electrochemical gradient	GO:0033180 proton-transporting V-type ATPase, V1 domain;GO:0033178 proton-transporting two-sector ATPase complex, catalytic domain;GO:0033176 proton-transporting V-type ATPase complex	[GO:0042592] homeostatic process;[GO:0007165] signal transduction;[GO:0016887] ATPase activity;[GO:0043234] protein complex;[GO:0022857] transmembrane transporter activity;[GO:0055085] transmembrane transport;[GO:0005829] cytosol;[GO:0005886] plasma membrane;[GO:0044281] small molecule metabolic process;[GO:0034641] cellular nitrogen compound metabolic process;[GO:0003674] molecular_function;[GO:…	GO:0046961 proton-transporting ATPase activity, rotational mechanism;GO:0036442 hydrogen-exporting ATPase activity;GO:0044769 ATPase activity, coupled to transmembrane movement of ions, rotational mechanism		Enzymes/ENZYME proteins/Hydrolases;Transporters/Primary Active Transporters	Nucleus;Vesicles	Alendronate (Proton-transporting atpase activity, rotational mechanism);Etidronic acid (Proton-transporting atpase activity, rotational mechanism);Tiludronate (Proton-transporting atpase activity, rotational mechanism);Bafilomycin A1 (Proton-transporting atpase activity, rotational mechanism);Bafilomycin B1 (Proton-transporting atpase activity, rotational mechanism)			1.0	0.0	1.0	0.0	0.0	0.0	1.0	0.0	0.0	0.0	0.0	0.0	0.0	0.0	0.0	0.0	0.0	0.0	0.0	0.0
KCNN2	3781	symbol	9606	3781	Human	KCNN2	potassium calcium-activated channel subfamily N member 2	GO:1901379 regulation of potassium ion transmembrane transport;GO:0071805 potassium ion transmembrane transport;GO:0043266 regulation of potassium ion transport	GO:0030018 Z disc;GO:0031674 I band;GO:0005790 smooth endoplasmic reticulum		GO:0016286 small conductance calcium-activated potassium channel activity;GO:0015269 calcium-activated potassium channel activity;GO:0005227 calcium activated cation channel activity		Transporters/Transporter channels and pores;Voltage-gated ion channels/Calcium-Activated Potassium Channels	Nucleus but not nucleoli;Cytoplasm	Miconazole (Small conductance calcium-activated potassium channel activity)			0.0	0.0	1.0	0.0	0.0	0.0	0.0	0.0	0.0	0.0	0.0	0.0	0.0	0.0	0.0	0.0	0.0	0.0	0.0	0.0
NMRAL1	57407	symbol	9606	57407	Human	NMRAL1	NmrA-like family domain containing 1		GO:0048471 perinuclear region of cytoplasm;GO:0005634 nucleus;GO:0044444 cytoplasmic part	[GO:0005622] intracellular;[GO:0005575] cellular_component;[GO:0005737] cytoplasm;[GO:0005623] cell;[GO:0005634] nucleus;[GO:0043226] organelle				Nucleus	2-(4-CHLORO-PHENYLAMINO)-NICOTINIC ACID			0.0	0.0	0.0	0.0	0.0	0.0	0.0	0.0	0.0	0.0	0.0	0.0	0.0	0.0	0.0	0.0	0.0	0.0	0.0	0.0
CAD	790	symbol	9606	790	Human	CAD	carbamoyl-phosphate synthetase 2, aspartate transcarbamylase, and dihydroorotase	GO:0044205 'de novo' UMP biosynthetic process;GO:0006526 arginine biosynthetic process;GO:0006222 UMP biosynthetic process	GO:0043195 terminal bouton;GO:0016363 nuclear matrix;GO:0043679 axon terminus		GO:0070335 aspartate binding;GO:0004088 carbamoyl-phosphate synthase (glutamine-hydrolyzing) activity;GO:0004070 aspartate carbamoyltransferase activity		Enzymes/ENZYME proteins/{Hydrolases,Ligase,Transferases}	Nucleus but not nucleoli	L-Aspartic Acid (Zinc ion binding);N-(phosphonacetyl)-L-aspartic acid (Zinc ion binding)	(M8873)ST FAS SIGNALING PATHWAY; (M66)PID MYC ACTIV PATHWAY	(M5926)HALLMARK MYC TARGETS V1	1.0	0.0	0.0	0.0	1.0	0.0	1.0	0.0	0.0	0.0	0.0	0.0	0.0	0.0	0.0	0.0	0.0	0.0	0.0	0.0
RQCD1	58184	symbol	10090	9125	Human	CNOT9	CCR4-NOT transcription complex subunit 9	GO:0033147 negative regulation of intracellular estrogen receptor signaling pathway;GO:2000327 positive regulation of ligand-dependent nuclear receptor transcription coactivator activity;GO:0000289 nuclear-transcribed mRNA poly(A) tail shortening	GO:0030015 CCR4-NOT core complex;GO:0000932 cytoplasmic mRNA processing body;GO:0030014 CCR4-NOT complex		GO:0042803 protein homodimerization activity;GO:0019904 protein domain specific binding;GO:0046983 protein dimerization activity						(M5925)HALLMARK E2F TARGETS	1.0	0.0	0.0	0.0	0.0	0.0	0.0	1.0	0.0	0.0	0.0	0.0	0.0	0.0	0.0	0.0	0.0	0.0	0.0	0.0
DOCK1	1793	symbol	9606	1793	Human	DOCK1	dedicator of cytokinesis 1	GO:0038096 Fc-gamma receptor signaling pathway involved in phagocytosis;GO:0007411 axon guidance;GO:0002431 Fc receptor mediated stimulatory signaling pathway	GO:0032045 guanyl-nucleotide exchange factor complex;GO:0005654 nucleoplasm;GO:0031981 nuclear lumen		GO:0005096 GTPase activator activity;GO:0017124 SH3 domain binding;GO:0030695 GTPase regulator activity			Nucleus		(M108)PID NETRIN PATHWAY; (M277)PID INTEGRIN A4B1 PATHWAY; (M241)PID RAC1 REG PATHWAY		1.0	0.0	0.0	0.0	1.0	0.0	1.0	0.0	0.0	0.0	0.0	0.0	0.0	1.0	0.0	0.0	0.0	0.0	0.0	1.0
CACNA2D4	93589	symbol	9606	93589	Human	CACNA2D4	calcium voltage-gated channel auxiliary subunit alpha2delta 4	GO:0050908 detection of light stimulus involved in visual perception;GO:0050962 detection of light stimulus involved in sensory perception;GO:0051924 regulation of calcium ion transport	GO:0005891 voltage-gated calcium channel complex;GO:0034704 calcium channel complex;GO:0034703 cation channel complex		GO:0005245 voltage-gated calcium channel activity;GO:0005262 calcium channel activity;GO:0022843 voltage-gated cation channel activity							0.0	0.0	1.0	0.0	0.0	0.0	0.0	0.0	0.0	0.0	0.0	0.0	0.0	0.0	1.0	0.0	0.0	0.0	0.0	0.0
TPK1	27010	symbol	9606	27010	Human	TPK1	thiamin pyrophosphokinase 1	GO:0009229 thiamine diphosphate biosynthetic process;GO:0006772 thiamine metabolic process;GO:0042357 thiamine diphosphate metabolic process	GO:0005829 cytosol;GO:0044444 cytoplasmic part;GO:0005737 cytoplasm		GO:0004788 thiamine diphosphokinase activity;GO:0030975 thiamine binding;GO:0016778 diphosphotransferase activity		Enzymes/ENZYME proteins/Transferases	Vesicles	Thiamine (Thiamine diphosphokinase activity);Pyrithiamine Pyrophosphate (Thiamine diphosphokinase activity)			0.0	0.0	0.0	0.0	0.0	0.0	0.0	0.0	0.0	0.0	0.0	0.0	0.0	0.0	0.0	0.0	0.0	0.0	0.0	0.0
SYBU	55638	symbol	9606	55638	Human	SYBU	syntabulin	GO:0061178 regulation of insulin secretion involved in cellular response to glucose stimulus;GO:0035773 insulin secretion involved in cellular response to glucose stimulus;GO:0050796 regulation of insulin secretion	GO:0097433 dense body;GO:0005874 microtubule;GO:0099513 polymeric cytoskeletal fiber		GO:0017075 syntaxin-1 binding;GO:0019894 kinesin binding;GO:0019905 syntaxin binding		Cytoskeleton related proteins	Vesicles			(M5906)HALLMARK ESTROGEN RESPONSE EARLY	1.0	0.0	0.0	0.0	0.0	0.0	0.0	0.0	1.0	0.0	0.0	0.0	0.0	0.0	0.0	0.0	0.0	0.0	0.0	0.0
IL32	9235	symbol	9606	9235	Human	IL32	interleukin 32	GO:0007155 cell adhesion;GO:0006952 defense response;GO:0006955 immune response	GO:0005615 extracellular space;GO:0044421 extracellular region part;GO:0005576 extracellular region		GO:0005125 cytokine activity;GO:0005102 receptor binding;GO:0005515 protein binding			Nucleus but not nucleoli			(M5930)HALLMARK EPITHELIAL MESENCHYMAL TRANSITION	0.0	0.0	0.0	0.0	0.0	0.0	0.0	0.0	0.0	0.0	0.0	0.0	0.0	0.0	0.0	0.0	0.0	0.0	0.0	0.0
ATP6V1G1	9550	symbol	9606	9550	Human	ATP6V1G1	ATPase H+ transporting V1 subunit G1	GO:0033572 transferrin transport;GO:0015682 ferric iron transport;GO:0006879 cellular iron ion homeostasis	GO:0016471 vacuolar proton-transporting V-type ATPase complex;GO:0033176 proton-transporting V-type ATPase complex;GO:0005765 lysosomal membrane		GO:0008553 hydrogen-exporting ATPase activity, phosphorylative mechanism;GO:0036442 hydrogen-exporting ATPase activity;GO:0015662 ATPase activity, coupled to transmembrane movement of ions, phosphorylative mechanism		Transporters/Primary Active Transporters	Nucleus;Nucleoli			(M5936)HALLMARK OXIDATIVE PHOSPHORYLATION	1.0	0.0	1.0	0.0	0.0	0.0	0.0	0.0	0.0	0.0	0.0	0.0	0.0	0.0	0.0	0.0	0.0	0.0	0.0	0.0
ARL17B	100506084	symbol	9606	100506084	Human	ARL17B	ADP ribosylation factor like GTPase 17B	GO:0007264 small GTPase mediated signal transduction;GO:0015031 protein transport;GO:0016192 vesicle-mediated transport	GO:0005794 Golgi apparatus;GO:0012505 endomembrane system;GO:0044444 cytoplasmic part	[GO:0005623] cell;[GO:0005737] cytoplasm;[GO:0005794] Golgi apparatus;[GO:0043226] organelle;[GO:0043167] ion binding;[GO:0005575] cellular_component;[GO:0005622] intracellular;[GO:0007165] signal transduction;[GO:0016192] vesicle-mediated transport;[GO:0006810] transport;[GO:0008150] biological_process;[GO:0003674] molecular_function	GO:0005525 GTP binding;GO:0032561 guanyl ribonucleotide binding;GO:0019001 guanyl nucleotide binding							0.0	0.0	0.0	0.0	0.0	0.0	0.0	0.0	0.0	0.0	0.0	0.0	0.0	0.0	0.0	0.0	0.0	0.0	0.0	0.0
CXorf65	158830	symbol	9606	158830	Human	CXorf65	chromosome X open reading frame 65											0.0	0.0	0.0	0.0	0.0	0.0	0.0	0.0	0.0	0.0	0.0	0.0	0.0	0.0	0.0	0.0	0.0	0.0	0.0	0.0
CLIC1	1192	symbol	9606	1192	Human	CLIC1	chloride intracellular channel 1	GO:1902476 chloride transmembrane transport;GO:0070527 platelet aggregation;GO:0045669 positive regulation of osteoblast differentiation	GO:0034707 chloride channel complex;GO:0031965 nuclear membrane;GO:0005903 brush border	[GO:0005635] nuclear envelope;[GO:0043226] organelle;[GO:0005737] cytoplasm;[GO:0005623] cell;[GO:0005634] nucleus;[GO:0003674] molecular_function;[GO:0008150] biological_process;[GO:0005886] plasma membrane;[GO:0006810] transport;[GO:0007155] cell adhesion;[GO:0007049] cell cycle;[GO:0006950] response to stress;[GO:0007165] signal transduction;[GO:0055085] transmembrane transport;[GO:0043234] pr…	GO:0005254 chloride channel activity;GO:0015108 chloride transmembrane transporter activity;GO:0005253 anion channel activity		Transporters/Transporter channels and pores	Cytoplasm				0.0	0.0	1.0	0.0	0.0	0.0	1.0	0.0	0.0	0.0	0.0	0.0	0.0	0.0	0.0	0.0	1.0	0.0	0.0	0.0
CADM2	253559	symbol	9606	253559	Human	CADM2	cell adhesion molecule 2	GO:0007157 heterophilic cell-cell adhesion via plasma membrane cell adhesion molecules;GO:0034332 adherens junction organization;GO:0007156 homophilic cell adhesion via plasma membrane adhesion molecules	GO:0005913 cell-cell adherens junction;GO:0030424 axon;GO:0005912 adherens junction		GO:0050839 cell adhesion molecule binding;GO:0042803 protein homodimerization activity;GO:0046983 protein dimerization activity						(M5915)HALLMARK APICAL JUNCTION	0.0	0.0	0.0	0.0	0.0	0.0	0.0	0.0	0.0	0.0	0.0	0.0	0.0	0.0	0.0	0.0	0.0	0.0	0.0	0.0
NR1H3	10062	symbol	9606	10062	Human	NR1H3	nuclear receptor subfamily 1 group H member 3	GO:0034145 positive regulation of toll-like receptor 4 signaling pathway;GO:0090341 negative regulation of secretion of lysosomal enzymes;GO:0034143 regulation of toll-like receptor 4 signaling pathway	GO:0000790 nuclear chromatin;GO:0090575 RNA polymerase II transcription factor complex;GO:0044798 nuclear transcription factor complex	[GO:0044281] small molecule metabolic process;[GO:0005622] intracellular;[GO:0005623] cell;[GO:0005634] nucleus;[GO:0005694] chromosome;[GO:0043226] organelle;[GO:0000228] nuclear chromosome;[GO:0005575] cellular_component;[GO:0034641] cellular nitrogen compound metabolic process;[GO:0008150] biological_process;[GO:0009058] biosynthetic process;[GO:0003674] molecular_function;[GO:0000988] transcr…	GO:0032810 sterol response element binding;GO:0015485 cholesterol binding;GO:0004879 RNA polymerase II transcription factor activity, ligand-activated sequence-specific DNA binding		Nuclear receptors;Transcription factors/Zinc-coordinating DNA-binding domains	Nucleus but not nucleoli	N-(2,2,2-TRIFLUOROETHYL)-N-{4-[2,2,2-TRIFLUORO-1-HYDROXY-1-(TRIFLUOROMETHYL)ETHYL]PHENYL}BENZENESULFONAMIDE (Zinc ion binding);N-(TERT-BUTYL)-3,5-DIMETHYL-N'-[(5-METHYL-2,3-DIHYDRO-1,4-BENZODIOXIN-6-YL)CARBONYL]BENZOHYDRAZIDE (Zinc ion binding);1-BENZYL-3-(4-METHOXYPHENYLAMINO)-4-PHENYLPYRROLE-2,5-DIONE (Zinc ion binding);(2E,4E)-11-METHOXY-3,7,11-TRIMETHYLDODECA-2,4-DIENOIC ACID (Zinc ion bindin…	(M162)PID RXR VDR PATHWAY		1.0	0.0	0.0	0.0	0.0	0.0	1.0	0.0	1.0	1.0	0.0	0.0	0.0	1.0	0.0	0.0	0.0	0.0	1.0	0.0
HSP90AA1	3320	symbol	9606	3320	Human	HSP90AA1	heat shock protein 90kDa alpha family class A member 1	GO:0033160 positive regulation of protein import into nucleus, translocation;GO:0033158 regulation of protein import into nucleus, translocation;GO:0045040 protein import into mitochondrial outer membrane	GO:0071682 endocytic vesicle lumen;GO:0043202 lysosomal lumen;GO:0031526 brush border membrane	[GO:0003723] RNA binding;[GO:0002376] immune system process;[GO:0007165] signal transduction;[GO:0006810] transport;[GO:0016192] vesicle-mediated transport;[GO:0043167] ion binding;[GO:0005576] extracellular region;[GO:0005773] vacuole;[GO:0043226] organelle;[GO:0005623] cell;[GO:0005737] cytoplasm;[GO:0005575] cellular_component;[GO:0005622] intracellular;[GO:0003674] molecular_function;[GO:0007…	GO:0032564 dATP binding;GO:0002135 CTP binding;GO:0002134 UTP binding			Cytoplasm	Rifabutin (Tpr domain binding);Nedocromil (Tpr domain binding);9-Butyl-8-(2,5-Dimethoxy-Benzyl)-9h-Purin-6-Ylamine (Tpr domain binding);Geldanamycin (Tpr domain binding);8-(2-Chloro-3,4,5-Trimethoxy-Benzyl)-2-Fluoro-9-Pent-4-Ylnyl-9h-Purin-6-Ylamine (Tpr domain binding);9-Butyl-8-(3,4,5-Trimethoxybenzyl)-9h-Purin-6-Amine (Tpr domain binding);4-(1,3-Benzodioxol-5-Yl)-5-(5-Ethyl-2,4-Dihydroxyphenyl…	(M201)PID ERBB NETWORK PATHWAY; (M180)PID HIF1A PATHWAY; (M226)PID VEGFR1 PATHWAY	(M5935)HALLMARK FATTY ACID METABOLISM	1.0	1.0	0.0	1.0	1.0	0.0	0.0	0.0	0.0	0.0	0.0	0.0	0.0	1.0	1.0	0.0	0.0	0.0	0.0	0.0
SPI1	6688	symbol	9606	6688	Human	SPI1	Spi-1 proto-oncogene	GO:0090241 negative regulation of histone H4 acetylation;GO:0044027 hypermethylation of CpG island;GO:1902262 apoptotic process involved in patterning of blood vessels	GO:0000790 nuclear chromatin;GO:0044454 nuclear chromosome part;GO:0000785 chromatin		GO:0000979 RNA polymerase II core promoter sequence-specific DNA binding;GO:0000980 RNA polymerase II distal enhancer sequence-specific DNA binding;GO:0051525 NFAT protein binding		Transcription factors/Helix-turn-helix domains			(M254)PID MYC REPRESS PATHWAY; (M28)PID IL4 2PATHWAY; (M279)PID RB 1PATHWAY	(M5950)HALLMARK ALLOGRAFT REJECTION	0.0	1.0	0.0	0.0	1.0	0.0	0.0	0.0	1.0	0.0	0.0	0.0	0.0	0.0	0.0	0.0	0.0	1.0	0.0	0.0
CTNNA3	29119	symbol	9606	29119	Human	CTNNA3	catenin alpha 3	GO:0086073 bundle of His cell-Purkinje myocyte adhesion involved in cell communication;GO:0098911 regulation of ventricular cardiac muscle cell action potential;GO:0086069 bundle of His cell to Purkinje myocyte communication	GO:0005916 fascia adherens;GO:0014704 intercalated disc;GO:0005913 cell-cell adherens junction	[GO:0005575] cellular_component;[GO:0005622] intracellular;[GO:0008092] cytoskeletal protein binding;[GO:0003674] molecular_function;[GO:0003013] circulatory system process;[GO:0008150] biological_process;[GO:0005623] cell;[GO:0005737] cytoplasm;[GO:0043226] organelle;[GO:0005856] cytoskeleton;[GO:0007155] cell adhesion	GO:0086083 cell adhesive protein binding involved in bundle of His cell-Purkinje myocyte communication;GO:0086080 protein binding involved in heterotypic cell-cell adhesion;GO:0098632 protein binding involved in cell-cell adhesion							0.0	1.0	0.0	0.0	0.0	0.0	0.0	0.0	0.0	1.0	0.0	0.0	0.0	0.0	1.0	0.0	0.0	0.0	0.0	1.0
ATP6V0D1	9114	symbol	9606	9114	Human	ATP6V0D1	ATPase H+ transporting V0 subunit d1	GO:0015991 ATP hydrolysis coupled proton transport;GO:0033572 transferrin transport;GO:0015988 energy coupled proton transmembrane transport, against electrochemical gradient	GO:0033179 proton-transporting V-type ATPase, V0 domain;GO:0016471 vacuolar proton-transporting V-type ATPase complex;GO:0030670 phagocytic vesicle membrane	[GO:0005886] plasma membrane;[GO:0005815] microtubule organizing center;[GO:0005856] cytoskeleton;[GO:0003674] molecular_function;[GO:0005764] lysosome;[GO:0005768] endosome;[GO:0007165] signal transduction;[GO:0043234] protein complex;[GO:0016023] cytoplasmic membrane-bounded vesicle;[GO:0042592] homeostatic process;[GO:0022607] cellular component assembly;[GO:0048646] anatomical structure forma…	GO:0008553 hydrogen-exporting ATPase activity, phosphorylative mechanism;GO:0036442 hydrogen-exporting ATPase activity;GO:0015662 ATPase activity, coupled to transmembrane movement of ions, phosphorylative mechanism		Transporters/Primary Active Transporters				(M5922)HALLMARK UNFOLDED PROTEIN RESPONSE	1.0	0.0	1.0	0.0	0.0	0.0	0.0	0.0	0.0	0.0	0.0	0.0	0.0	0.0	0.0	0.0	0.0	0.0	0.0	0.0
ATP6V0A2	23545	symbol	9606	23545	Human	ATP6V0A2	ATPase H+ transporting V0 subunit a2	GO:0007035 vacuolar acidification;GO:0015986 ATP synthesis coupled proton transport;GO:0051452 intracellular pH reduction	GO:0000220 vacuolar proton-transporting V-type ATPase, V0 domain;GO:0033179 proton-transporting V-type ATPase, V0 domain;GO:0016471 vacuolar proton-transporting V-type ATPase complex	[GO:0005764] lysosome;[GO:0005768] endosome;[GO:0006810] transport;[GO:0008150] biological_process;[GO:0005575] cellular_component;[GO:0005622] intracellular;[GO:0005623] cell;[GO:0005737] cytoplasm;[GO:0005773] vacuole;[GO:0043226] organelle;[GO:0043234] protein complex;[GO:0016887] ATPase activity;[GO:0019899] enzyme binding;[GO:0007165] signal transduction;[GO:0042592] homeostatic process;[GO:…	GO:0046961 proton-transporting ATPase activity, rotational mechanism;GO:0036442 hydrogen-exporting ATPase activity;GO:0044769 ATPase activity, coupled to transmembrane movement of ions, rotational mechanism			Cytoplasm				1.0	0.0	1.0	0.0	0.0	0.0	1.0	0.0	0.0	0.0	0.0	0.0	0.0	0.0	0.0	0.0	0.0	0.0	0.0	0.0
CTD-2370N5.3						None	None	None	None	None	None	None	None	None	None	None	None	nan	nan	nan	nan	nan	nan	nan	nan	nan	nan	nan	nan	nan	nan	nan	nan	nan	nan	nan	nan
ETNK1	55500	symbol	9606	55500	Human	ETNK1	ethanolamine kinase 1	GO:0006646 phosphatidylethanolamine biosynthetic process;GO:0046337 phosphatidylethanolamine metabolic process;GO:0046474 glycerophospholipid biosynthetic process	GO:0005654 nucleoplasm;GO:0031981 nuclear lumen;GO:0044428 nuclear part		GO:0004305 ethanolamine kinase activity;GO:0005524 ATP binding;GO:0032559 adenyl ribonucleotide binding		Enzymes/ENZYME proteins/Transferases	Plasma membrane;Cytoplasm				0.0	0.0	0.0	0.0	0.0	0.0	0.0	0.0	0.0	0.0	0.0	0.0	0.0	0.0	0.0	0.0	0.0	0.0	0.0	0.0
SDK1	221935	symbol	9606	221935	Human	SDK1	sidekick cell adhesion molecule 1	GO:0060998 regulation of dendritic spine development;GO:0010842 retina layer formation;GO:0060996 dendritic spine development	GO:0045202 synapse;GO:0070062 extracellular exosome;GO:1903561 extracellular vesicle		GO:0042802 identical protein binding;GO:0005515 protein binding;GO:0005488 binding			Cytoplasm				1.0	0.0	0.0	0.0	1.0	0.0	1.0	0.0	0.0	0.0	0.0	0.0	0.0	0.0	0.0	0.0	0.0	0.0	0.0	0.0
AGBL2	79841	symbol	9606	79841	Human	AGBL2	ATP/GTP binding protein-like 2	GO:0035610 protein side chain deglutamylation;GO:0035608 protein deglutamylation;GO:0018200 peptidyl-glutamic acid modification	GO:0005814 centriole;GO:0036064 ciliary basal body;GO:0044450 microtubule organizing center part	[GO:0003674] molecular_function;[GO:0008233] peptidase activity;[GO:0043167] ion binding;[GO:0008150] biological_process;[GO:0005622] intracellular;[GO:0005575] cellular_component;[GO:0043226] organelle;[GO:0005829] cytosol;[GO:0005815] microtubule organizing center;[GO:0005856] cytoskeleton;[GO:0005929] cilium;[GO:0006464] cellular protein modification process;[GO:0005737] cytoplasm;[GO:0005623]…	GO:0004181 metallocarboxypeptidase activity;GO:0004180 carboxypeptidase activity;GO:0008235 metalloexopeptidase activity		Enzymes/Peptidases/Metallopeptidases					0.0	0.0	0.0	0.0	0.0	0.0	0.0	0.0	0.0	0.0	0.0	0.0	0.0	0.0	0.0	0.0	0.0	0.0	0.0	0.0
PTPN6	5777	symbol	9606	5777	Human	PTPN6	protein tyrosine phosphatase, non-receptor type 6	GO:0051279 regulation of release of sequestered calcium ion into cytosol;GO:0051209 release of sequestered calcium ion into cytosol;GO:0050859 negative regulation of B cell receptor signaling pathway	GO:0042105 alpha-beta T cell receptor complex;GO:0042101 T cell receptor complex;GO:0098802 plasma membrane receptor complex	[GO:0006464] cellular protein modification process;[GO:0007165] signal transduction;[GO:0007049] cell cycle;[GO:0008150] biological_process;[GO:0005829] cytosol;[GO:0003674] molecular_function;[GO:0016791] phosphatase activity;[GO:0002376] immune system process;[GO:0008283] cell proliferation;[GO:0040011] locomotion;[GO:0048870] cell motility;[GO:0019899] enzyme binding;[GO:0007155] cell adhesion…	GO:0005001 transmembrane receptor protein tyrosine phosphatase activity;GO:0019198 transmembrane receptor protein phosphatase activity;GO:0001784 phosphotyrosine binding		Enzymes/ENZYME proteins/Hydrolases	Nucleus		(M233)PID EPO PATHWAY; (M127)PID ERBB1 RECEPTOR PROXIMAL PATHWAY; (M142)PID AJDISS 2PATHWAY	(M5950)HALLMARK ALLOGRAFT REJECTION; (M5913)HALLMARK INTERFERON GAMMA RESPONSE; (M5907)HALLMARK ESTROGEN RESPONSE LATE	1.0	0.0	1.0	1.0	0.0	0.0	1.0	0.0	1.0	1.0	0.0	1.0	0.0	1.0	0.0	0.0	0.0	0.0	1.0	0.0
KCNIP4	80333	symbol	9606	80333	Human	KCNIP4	potassium voltage-gated channel interacting protein 4	GO:1901379 regulation of potassium ion transmembrane transport;GO:0071805 potassium ion transmembrane transport;GO:0043266 regulation of potassium ion transport	GO:0008076 voltage-gated potassium channel complex;GO:0034705 potassium channel complex;GO:0034703 cation channel complex	[GO:0043167] ion binding;[GO:0022857] transmembrane transporter activity;[GO:0005622] intracellular;[GO:0005575] cellular_component;[GO:0005623] cell;[GO:0005737] cytoplasm;[GO:0005886] plasma membrane;[GO:0005783] endoplasmic reticulum;[GO:0043226] organelle;[GO:0005829] cytosol;[GO:0043234] protein complex;[GO:0007009] plasma membrane organization;[GO:0061024] membrane organization;[GO:0008150]…	GO:0005267 potassium channel activity;GO:0015079 potassium ion transmembrane transporter activity;GO:0005244 voltage-gated ion channel activity		Transporters/Transport Electron Carriers			(M223)PID BETA CATENIN NUC PATHWAY		0.0	0.0	1.0	0.0	0.0	0.0	0.0	0.0	0.0	0.0	0.0	0.0	0.0	0.0	1.0	0.0	0.0	0.0	0.0	0.0
C10orf11	83938	symbol	9606	83938	Human	C10orf11	chromosome 10 open reading frame 11	GO:0030318 melanocyte differentiation;GO:0060563 neuroepithelial cell differentiation;GO:0050931 pigment cell differentiation						Nucleus				0.0	0.0	0.0	0.0	0.0	0.0	0.0	0.0	0.0	0.0	0.0	0.0	0.0	0.0	0.0	0.0	0.0	0.0	0.0	0.0
SKIDA1	387640	symbol	9606	387640	Human	SKIDA1	SKI/DACH domain containing 1							Nucleus but not nucleoli;Cytoplasm				0.0	0.0	0.0	0.0	0.0	0.0	0.0	0.0	0.0	0.0	0.0	0.0	0.0	0.0	0.0	0.0	0.0	0.0	0.0	0.0
SLC35F1	222553	symbol	9606	222553	Human	SLC35F1	solute carrier family 35 member F1	GO:0006810 transport;GO:0051234 establishment of localization;GO:0051179 localization	GO:0016021 integral component of membrane;GO:0031224 intrinsic component of membrane;GO:0044425 membrane part				Transporters/Electrochemical Potential-driven transporters	Nucleus but not nucleoli				0.0	0.0	0.0	0.0	0.0	0.0	0.0	0.0	0.0	0.0	0.0	0.0	0.0	0.0	0.0	0.0	0.0	0.0	0.0	0.0
AS3MT	57412	symbol	9606	57412	Human	AS3MT	arsenite methyltransferase	GO:0018872 arsonoacetate metabolic process;GO:0009404 toxin metabolic process;GO:0006805 xenobiotic metabolic process	GO:0005739 mitochondrion;GO:0005829 cytosol;GO:0044444 cytoplasmic part		GO:0030791 arsenite methyltransferase activity;GO:0030792 methylarsonite methyltransferase activity;GO:0008757 S-adenosylmethionine-dependent methyltransferase activity		Enzymes/ENZYME proteins/Transferases	Nucleus;Nucleoli				0.0	0.0	0.0	0.0	0.0	0.0	0.0	0.0	0.0	0.0	0.0	0.0	0.0	0.0	0.0	0.0	0.0	0.0	0.0	0.0
ZNF112	7771	symbol	9606	7771	Human	ZNF112	zinc finger protein 112	GO:0006355 regulation of transcription, DNA-templated;GO:1903506 regulation of nucleic acid-templated transcription;GO:0006351 transcription, DNA-templated	GO:0005634 nucleus;GO:0043231 intracellular membrane-bounded organelle;GO:0043229 intracellular organelle		GO:0003700 transcription factor activity, sequence-specific DNA binding;GO:0001071 nucleic acid binding transcription factor activity;GO:0003677 DNA binding		Transcription factors/Zinc-coordinating DNA-binding domains	Centrosome			(M5956)HALLMARK KRAS SIGNALING DN	0.0	0.0	0.0	0.0	0.0	0.0	0.0	0.0	0.0	0.0	0.0	0.0	0.0	0.0	0.0	0.0	0.0	0.0	0.0	0.0
STRIP1	85369	symbol	9606	85369	Human	STRIP1	striatin interacting protein 1	GO:0030866 cortical actin cytoskeleton organization;GO:0030865 cortical cytoskeleton organization;GO:0022604 regulation of cell morphogenesis	GO:0070062 extracellular exosome;GO:1903561 extracellular vesicle;GO:0043230 extracellular organelle	[GO:0003674] molecular_function;[GO:0007010] cytoskeleton organization;[GO:0000902] cell morphogenesis;[GO:0008150] biological_process;[GO:0048856] anatomical structure development;[GO:0005575] cellular_component;[GO:0005576] extracellular region;[GO:0005622] intracellular;[GO:0005623] cell;[GO:0043226] organelle;[GO:0005737] cytoplasm;[GO:0005634] nucleus	GO:0005515 protein binding;GO:0005488 binding;GO:0003674 molecular_function			Cytoplasm				0.0	0.0	0.0	0.0	0.0	0.0	0.0	0.0	0.0	0.0	0.0	0.0	0.0	0.0	0.0	0.0	0.0	0.0	0.0	0.0
GPC3	2719	symbol	9606	2719	Human	GPC3	glypican 3	GO:0072180 mesonephric duct morphogenesis;GO:0001658 branching involved in ureteric bud morphogenesis;GO:0072138 mesenchymal cell proliferation involved in ureteric bud development	GO:0043202 lysosomal lumen;GO:0046658 anchored component of plasma membrane;GO:0005775 vacuolar lumen	[GO:0006629] lipid metabolic process;[GO:0008150] biological_process;[GO:0048856] anatomical structure development;[GO:0003674] molecular_function;[GO:0005576] extracellular region;[GO:0005578] proteinaceous extracellular matrix;[GO:0005615] extracellular space;[GO:0030234] enzyme regulator activity;[GO:0005773] vacuole;[GO:0043226] organelle;[GO:0005623] cell;[GO:0005737] cytoplasm;[GO:0005575] …	GO:0060422 peptidyl-dipeptidase inhibitor activity;GO:0043395 heparan sulfate proteoglycan binding;GO:0043394 proteoglycan binding			Plasma membrane		(M5880)NABA ECM AFFILIATED; (M5885)NABA MATRISOME ASSOCIATED; (M5889)NABA MATRISOME	(M5932)HALLMARK INFLAMMATORY RESPONSE; (M5937)HALLMARK GLYCOLYSIS; (M5891)HALLMARK HYPOXIA	1.0	0.0	0.0	0.0	1.0	0.0	0.0	0.0	1.0	0.0	0.0	1.0	0.0	0.0	0.0	0.0	1.0	0.0	0.0	0.0
CCND3	896	symbol	9606	896	Human	CCND3	cyclin D3	GO:0045737 positive regulation of cyclin-dependent protein serine/threonine kinase activity;GO:1904031 positive regulation of cyclin-dependent protein kinase activity;GO:0042098 T cell proliferation	GO:0000307 cyclin-dependent protein kinase holoenzyme complex;GO:1902554 serine/threonine protein kinase complex;GO:1902911 protein kinase complex		GO:0004693 cyclin-dependent protein serine/threonine kinase activity;GO:0097472 cyclin-dependent protein kinase activity;GO:0004674 protein serine/threonine kinase activity			Plasma membrane;Cytoplasm		(M234)PID IL2 STAT5 PATHWAY; (M58)PID AR PATHWAY; (M279)PID RB 1PATHWAY	(M5908)HALLMARK ANDROGEN RESPONSE; (M5941)HALLMARK UV RESPONSE UP; (M5950)HALLMARK ALLOGRAFT REJECTION	0.0	0.0	0.0	0.0	0.0	0.0	0.0	0.0	0.0	0.0	0.0	0.0	0.0	0.0	0.0	0.0	0.0	0.0	0.0	0.0
ERC2	26059	symbol	9606	26059	Human	ERC2	ELKS/RAB6-interacting/CAST family member 2		GO:0042734 presynaptic membrane;GO:0048786 presynaptic active zone;GO:0097060 synaptic membrane		GO:0005515 protein binding;GO:0005488 binding;GO:0003674 molecular_function		Cytoskeleton related proteins					0.0	0.0	0.0	0.0	0.0	0.0	0.0	0.0	0.0	0.0	0.0	0.0	0.0	0.0	0.0	0.0	0.0	0.0	0.0	0.0
BNIP3L	665	symbol	9606	665	Human	BNIP3L	BCL2/adenovirus E1B 19kDa interacting protein 3-like	GO:0097345 mitochondrial outer membrane permeabilization;GO:1902110 positive regulation of mitochondrial membrane permeability involved in apoptotic process;GO:0035694 mitochondrial protein catabolic process	GO:0005741 mitochondrial outer membrane;GO:0031968 organelle outer membrane;GO:0031966 mitochondrial membrane		GO:0005521 lamin binding;GO:0046982 protein heterodimerization activity;GO:0042803 protein homodimerization activity		Mitochondrial proteins;Transporters/Transporter channels and pores	Mitochondria		(M145)PID P53 DOWNSTREAM PATHWAY	(M5902)HALLMARK APOPTOSIS; (M5891)HALLMARK HYPOXIA; (M5945)HALLMARK HEME METABOLISM	1.0	1.0	0.0	0.0	0.0	0.0	0.0	0.0	0.0	0.0	0.0	0.0	0.0	0.0	0.0	0.0	0.0	0.0	0.0	0.0
NBAS	51594	symbol	9606	51594	Human	NBAS	neuroblastoma amplified sequence	GO:2000623 negative regulation of nuclear-transcribed mRNA catabolic process, nonsense-mediated decay;GO:2000622 regulation of nuclear-transcribed mRNA catabolic process, nonsense-mediated decay;GO:1902373 negative regulation of mRNA catabolic process	GO:0070939 Dsl1p complex;GO:0005789 endoplasmic reticulum membrane;GO:0044432 endoplasmic reticulum part	[GO:0005623] cell;[GO:0005737] cytoplasm;[GO:0043226] organelle;[GO:0005783] endoplasmic reticulum;[GO:0006810] transport;[GO:0043234] protein complex;[GO:0016192] vesicle-mediated transport;[GO:0005575] cellular_component;[GO:0005622] intracellular;[GO:0003674] molecular_function;[GO:0008150] biological_process;[GO:0009056] catabolic process;[GO:0034641] cellular nitrogen compound metabolic proc…	GO:0000149 SNARE binding;GO:0005515 protein binding;GO:0005488 binding			Golgi apparatus				1.0	0.0	0.0	0.0	0.0	0.0	0.0	0.0	0.0	0.0	0.0	0.0	0.0	0.0	0.0	1.0	0.0	0.0	0.0	0.0
ICA1L	130026	symbol	9606	130026	Human	ICA1L	islet cell autoantigen 1 like			[GO:0003674] molecular_function	GO:0019904 protein domain specific binding;GO:0005515 protein binding;GO:0005488 binding			Mitochondria				0.0	0.0	0.0	0.0	0.0	0.0	0.0	0.0	0.0	0.0	0.0	0.0	0.0	0.0	0.0	0.0	0.0	0.0	0.0	0.0
ISY1	57461	symbol	9606	57461	Human	ISY1	ISY1 splicing factor homolog	GO:0000389 mRNA 3'-splice site recognition;GO:0000350 generation of catalytic spliceosome for second transesterification step;GO:0000393 spliceosomal conformational changes to generate catalytic conformation	GO:0071020 post-spliceosomal complex;GO:0071012 catalytic step 1 spliceosome;GO:0071014 post-mRNA release spliceosomal complex		GO:0000384 first spliceosomal transesterification activity;GO:0044822 poly(A) RNA binding;GO:0003723 RNA binding			Nucleus but not nucleoli				0.0	0.0	0.0	0.0	0.0	0.0	0.0	0.0	0.0	0.0	0.0	0.0	0.0	0.0	0.0	0.0	0.0	0.0	0.0	0.0
FGF1	2246	symbol	9606	2246	Human	FGF1	fibroblast growth factor 1	GO:0060681 branch elongation involved in ureteric bud branching;GO:0060677 ureteric bud elongation;GO:0001658 branching involved in ureteric bud morphogenesis	GO:0005938 cell cortex;GO:0099568 cytoplasmic region;GO:0005730 nucleolus		GO:0005104 fibroblast growth factor receptor binding;GO:0044548 S100 protein binding;GO:0030544 Hsp70 protein binding		RAS pathway related proteins	Nucleus but not nucleoli	Pentosan Polysulfate (S100 protein binding);Amlexanox (S100 protein binding);Sucrose Octasulfate (S100 protein binding);Formic Acid (S100 protein binding);O2-Sulfo-Glucuronic Acid (S100 protein binding);N,O6-Disulfo-Glucosamine (S100 protein binding);Naphthalene Trisulfonate (S100 protein binding);Pazopanib (S100 protein binding);5-AMINO-NAPHTALENE-2-MONOSULFONATE (S100 protein binding)	(M276)PID FGF PATHWAY; (M5883)NABA SECRETED FACTORS; (M5885)NABA MATRISOME ASSOCIATED		1.0	1.0	0.0	0.0	1.0	0.0	0.0	0.0	0.0	0.0	0.0	0.0	0.0	1.0	0.0	0.0	0.0	0.0	0.0	0.0
SEPT14	346288	symbol	9606	346288	Human	SEPT14	septin 14	GO:0051301 cell division;GO:0007049 cell cycle;GO:0044763 single-organism cellular process	GO:0005856 cytoskeleton;GO:0043232 intracellular non-membrane-bounded organelle;GO:0043228 non-membrane-bounded organelle		GO:0005525 GTP binding;GO:0032561 guanyl ribonucleotide binding;GO:0019001 guanyl nucleotide binding							0.0	0.0	0.0	0.0	0.0	0.0	0.0	0.0	0.0	0.0	0.0	0.0	0.0	0.0	0.0	0.0	0.0	0.0	0.0	0.0
DPP6	1804	symbol	9606	1804	Human	DPP6	dipeptidyl peptidase like 6	GO:1901379 regulation of potassium ion transmembrane transport;GO:0043268 positive regulation of potassium ion transport;GO:0071805 potassium ion transmembrane transport	GO:0008076 voltage-gated potassium channel complex;GO:0034705 potassium channel complex;GO:0034703 cation channel complex	[GO:0003674] molecular_function;[GO:0008150] biological_process;[GO:0008233] peptidase activity;[GO:0005575] cellular_component;[GO:0005886] plasma membrane;[GO:0043226] organelle;[GO:0055085] transmembrane transport;[GO:0006810] transport;[GO:0043234] protein complex;[GO:0007009] plasma membrane organization;[GO:0061024] membrane organization;[GO:0005623] cell;[GO:0005576] extracellular region	GO:0008239 dipeptidyl-peptidase activity;GO:0004177 aminopeptidase activity;GO:0015459 potassium channel regulator activity		Enzymes/Peptidases/Serine-type peptidases					0.0	0.0	1.0	0.0	0.0	0.0	0.0	0.0	0.0	0.0	0.0	0.0	0.0	0.0	0.0	0.0	0.0	0.0	0.0	0.0
SSRP1	6749	symbol	9606	6749	Human	SSRP1	structure specific recognition protein 1	GO:0050434 positive regulation of viral transcription;GO:0046782 regulation of viral transcription;GO:0006368 transcription elongation from RNA polymerase II promoter	GO:0005730 nucleolus;GO:0005694 chromosome;GO:0005654 nucleoplasm	[GO:0003674] molecular_function;[GO:0003723] RNA binding;[GO:0003677] DNA binding;[GO:0005622] intracellular;[GO:0005575] cellular_component;[GO:0005634] nucleus;[GO:0005737] cytoplasm;[GO:0043226] organelle;[GO:0005623] cell;[GO:0005694] chromosome;[GO:0005730] nucleolus;[GO:0005654] nucleoplasm;[GO:0008150] biological_process;[GO:0034641] cellular nitrogen compound metabolic process;[GO:0009058…	GO:0003682 chromatin binding;GO:0044822 poly(A) RNA binding;GO:0003723 RNA binding		Transcription factors/Other all-alpha-helical DNA-binding domains	Cytoplasm		(M256)PID TAP63 PATHWAY	(M5898)HALLMARK DNA REPAIR; (M5925)HALLMARK E2F TARGETS	0.0	0.0	0.0	0.0	0.0	1.0	0.0	0.0	0.0	0.0	0.0	0.0	0.0	0.0	0.0	0.0	0.0	0.0	0.0	0.0
MGAT5B	146664	symbol	9606	146664	Human	MGAT5B	mannosyl (alpha-1,6-)-glycoprotein beta-1,6-N-acetyl-glucosaminyltransferase, isozyme B	GO:0006487 protein N-linked glycosylation;GO:0006486 protein glycosylation;GO:0043413 macromolecule glycosylation	GO:0000139 Golgi membrane;GO:0044431 Golgi apparatus part;GO:0005794 Golgi apparatus	[GO:0005575] cellular_component;[GO:0043226] organelle;[GO:0005737] cytoplasm;[GO:0005794] Golgi apparatus;[GO:0005623] cell;[GO:0005622] intracellular;[GO:0043167] ion binding;[GO:0016757] transferase activity, transferring glycosyl groups;[GO:0003674] molecular_function;[GO:0005975] carbohydrate metabolic process;[GO:0008150] biological_process;[GO:0006464] cellular protein modification process…	GO:0030144 alpha-1,6-mannosylglycoprotein 6-beta-N-acetylglucosaminyltransferase activity;GO:0008375 acetylglucosaminyltransferase activity;GO:0008194 UDP-glycosyltransferase activity		Enzymes/ENZYME proteins/Transferases					0.0	0.0	0.0	0.0	0.0	0.0	0.0	0.0	0.0	0.0	0.0	0.0	0.0	0.0	0.0	0.0	0.0	0.0	0.0	0.0
CENPI	2491	symbol	9606	2491	Human	CENPI	centromere protein I	GO:0042699 follicle-stimulating hormone signaling pathway;GO:0034080 CENP-A containing nucleosome assembly;GO:0006336 DNA replication-independent nucleosome assembly	GO:0000776 kinetochore;GO:0000775 chromosome, centromeric region;GO:0098687 chromosomal region		GO:0005515 protein binding;GO:0005488 binding;GO:0003674 molecular_function			Nucleus				0.0	0.0	0.0	0.0	0.0	0.0	0.0	0.0	0.0	0.0	0.0	0.0	0.0	0.0	0.0	0.0	0.0	0.0	0.0	0.0
ZNF710	374655	symbol	9606	374655	Human	ZNF710	zinc finger protein 710	GO:0006357 regulation of transcription from RNA polymerase II promoter;GO:0006366 transcription from RNA polymerase II promoter;GO:0006355 regulation of transcription, DNA-templated	GO:0005634 nucleus;GO:0043231 intracellular membrane-bounded organelle;GO:0043229 intracellular organelle		GO:0003712 transcription cofactor activity;GO:0000989 transcription factor activity, transcription factor binding;GO:0000988 transcription factor activity, protein binding		Transcription factors/Zinc-coordinating DNA-binding domains	Nucleus				0.0	0.0	0.0	0.0	0.0	0.0	0.0	0.0	0.0	0.0	0.0	0.0	0.0	0.0	0.0	0.0	0.0	0.0	0.0	0.0
TIAM2	26230	symbol	9606	26230	Human	TIAM2	T-cell lymphoma invasion and metastasis 2	GO:0035023 regulation of Rho protein signal transduction;GO:0007266 Rho protein signal transduction;GO:0046578 regulation of Ras protein signal transduction	GO:0030175 filopodium;GO:0030426 growth cone;GO:0030027 lamellipodium	[GO:0043226] organelle;[GO:0006629] lipid metabolic process;[GO:0044281] small molecule metabolic process;[GO:0007165] signal transduction;[GO:0008219] cell death;[GO:0008150] biological_process;[GO:0003674] molecular_function;[GO:0005575] cellular_component;[GO:0005622] intracellular;[GO:0004871] signal transducer activity;[GO:0030234] enzyme regulator activity;[GO:0005576] extracellular region;…	GO:0005089 Rho guanyl-nucleotide exchange factor activity;GO:0005096 GTPase activator activity;GO:0005088 Ras guanyl-nucleotide exchange factor activity			Nucleus;Nucleoli;Cytoplasm		(M241)PID RAC1 REG PATHWAY		1.0	0.0	0.0	0.0	1.0	0.0	0.0	0.0	0.0	0.0	0.0	0.0	0.0	0.0	0.0	0.0	0.0	0.0	0.0	0.0
HNRNPL	3191	symbol	9606	3191	Human	HNRNPL	heterogeneous nuclear ribonucleoprotein L	GO:0000381 regulation of alternative mRNA splicing, via spliceosome;GO:0000380 alternative mRNA splicing, via spliceosome;GO:0048024 regulation of mRNA splicing, via spliceosome	GO:0045120 pronucleus;GO:0035770 ribonucleoprotein granule;GO:0005654 nucleoplasm		GO:0097157 pre-mRNA intronic binding;GO:0036002 pre-mRNA binding;GO:0044212 transcription regulatory region DNA binding							0.0	0.0	0.0	0.0	0.0	0.0	0.0	0.0	0.0	0.0	0.0	0.0	0.0	0.0	0.0	1.0	0.0	0.0	0.0	0.0

## Sheet: Enrichment
GroupID	Category	Term	Description	LogP	Log(q-value)	InTerm_InList	Genes	Symbols
1_Summary	GO Biological Processes	GO:0033572	transferrin transport	-7.54758	-7.97217	6/35	523,537,1213,9114,9550,23545,2066,2246,3091,4763,5770,5777,6263,7248,7249,7490,23318,389421,665,1201,9125,10062,1793,3320,5125,26230,790,221935,126306,51594,54583,2719,55638,3783,8131	ATP6V1A,ATP6AP1,CLTC,ATP6V0D1,ATP6V1G1,ATP6V0A2,ERBB4,FGF1,HIF1A,NF1,PTPN1,PTPN6,RYR3,TSC1,TSC2,WT1,ZCCHC11,LIN28B,BNIP3L,CLN3,CNOT9,NR1H3,DOCK1,HSP90AA1,PCSK5,TIAM2,CAD,SDK1,JSRP1,NBAS,EGLN1,GPC3,SYBU,KCNN4,NPRL3
1_Member	GO Biological Processes	GO:0033572	transferrin transport	-7.54758	-7.97217	6/35	523,537,1213,9114,9550,23545	ATP6V1A,ATP6AP1,CLTC,ATP6V0D1,ATP6V1G1,ATP6V0A2
1_Member	GO Biological Processes	GO:0072512	trivalent inorganic cation transport	-7.39531	-7.97217	6/37	523,537,1213,9114,9550,23545	ATP6V1A,ATP6AP1,CLTC,ATP6V0D1,ATP6V1G1,ATP6V0A2
1_Member	GO Biological Processes	GO:0015682	ferric iron transport	-7.39531	-7.97217	6/37	523,537,1213,9114,9550,23545	ATP6V1A,ATP6AP1,CLTC,ATP6V0D1,ATP6V1G1,ATP6V0A2
1_Member	GO Biological Processes	GO:1901699	cellular response to nitrogen compound	-6.59474	-7.29371	17/719	523,537,2066,2246,3091,4763,5770,5777,6263,7248,7249,7490,9114,9550,23318,23545,389421	ATP6V1A,ATP6AP1,ERBB4,FGF1,HIF1A,NF1,PTPN1,PTPN6,RYR3,TSC1,TSC2,WT1,ATP6V0D1,ATP6V1G1,ZCCHC11,ATP6V0A2,LIN28B
1_Member	GO Biological Processes	GO:0006826	iron ion transport	-6.23945	-7.0176	6/57	523,537,1213,9114,9550,23545	ATP6V1A,ATP6AP1,CLTC,ATP6V0D1,ATP6V1G1,ATP6V0A2
1_Member	GO Biological Processes	GO:0016241	regulation of macroautophagy	-5.96458	-6.80968	8/145	523,665,1201,3091,7248,9114,9550,23545	ATP6V1A,BNIP3L,CLN3,HIF1A,TSC1,ATP6V0D1,ATP6V1G1,ATP6V0A2
1_Member	GO Biological Processes	GO:0032869	cellular response to insulin stimulus	-5.82255	-6.72564	12/400	523,537,2066,2246,3091,4763,5770,7248,7249,9114,9550,23545	ATP6V1A,ATP6AP1,ERBB4,FGF1,HIF1A,NF1,PTPN1,TSC1,TSC2,ATP6V0D1,ATP6V1G1,ATP6V0A2
1_Member	GO Biological Processes	GO:0008286	insulin receptor signaling pathway	-5.7649	-6.71915	11/334	523,537,2066,2246,4763,5770,7248,7249,9114,9550,23545	ATP6V1A,ATP6AP1,ERBB4,FGF1,NF1,PTPN1,TSC1,TSC2,ATP6V0D1,ATP6V1G1,ATP6V0A2
1_Member	GO Biological Processes	GO:0006879	cellular iron ion homeostasis	-5.63354	-6.67899	6/72	523,537,3091,9114,9550,23545	ATP6V1A,ATP6AP1,HIF1A,ATP6V0D1,ATP6V1G1,ATP6V0A2
1_Member	GO Biological Processes	GO:0071417	cellular response to organonitrogen compound	-5.62497	-6.67899	15/663	523,537,2066,2246,3091,4763,5770,5777,6263,7248,7249,7490,9114,9550,23545	ATP6V1A,ATP6AP1,ERBB4,FGF1,HIF1A,NF1,PTPN1,PTPN6,RYR3,TSC1,TSC2,WT1,ATP6V0D1,ATP6V1G1,ATP6V0A2
1_Member	GO Biological Processes	GO:0071375	cellular response to peptide hormone stimulus	-5.59981	-6.67899	13/498	523,537,2066,2246,3091,4763,5770,5777,7248,7249,9114,9550,23545	ATP6V1A,ATP6AP1,ERBB4,FGF1,HIF1A,NF1,PTPN1,PTPN6,TSC1,TSC2,ATP6V0D1,ATP6V1G1,ATP6V0A2
1_Member	GO Biological Processes	GO:0032104	regulation of response to extracellular stimulus	-5.46594	-6.62595	8/169	523,665,1201,3091,7248,9114,9550,23545	ATP6V1A,BNIP3L,CLN3,HIF1A,TSC1,ATP6V0D1,ATP6V1G1,ATP6V0A2
1_Member	GO Biological Processes	GO:0032107	regulation of response to nutrient levels	-5.46594	-6.62595	8/169	523,665,1201,3091,7248,9114,9550,23545	ATP6V1A,BNIP3L,CLN3,HIF1A,TSC1,ATP6V0D1,ATP6V1G1,ATP6V0A2
1_Member	GO Biological Processes	GO:1901653	cellular response to peptide	-5.44986	-6.62595	13/514	523,537,2066,2246,3091,4763,5770,5777,7248,7249,9114,9550,23545	ATP6V1A,ATP6AP1,ERBB4,FGF1,HIF1A,NF1,PTPN1,PTPN6,TSC1,TSC2,ATP6V0D1,ATP6V1G1,ATP6V0A2
1_Member	GO Biological Processes	GO:0032868	response to insulin	-5.29676	-6.50088	12/450	523,537,2066,2246,3091,4763,5770,7248,7249,9114,9550,23545	ATP6V1A,ATP6AP1,ERBB4,FGF1,HIF1A,NF1,PTPN1,TSC1,TSC2,ATP6V0D1,ATP6V1G1,ATP6V0A2
1_Member	GO Biological Processes	GO:0032870	cellular response to hormone stimulus	-5.13873	-6.42462	16/822	523,537,2066,2246,3091,4763,5770,5777,7248,7249,7490,9114,9125,9550,10062,23545	ATP6V1A,ATP6AP1,ERBB4,FGF1,HIF1A,NF1,PTPN1,PTPN6,TSC1,TSC2,WT1,ATP6V0D1,CNOT9,ATP6V1G1,NR1H3,ATP6V0A2
1_Member	KEGG Pathway	ko05110	Vibrio cholerae infection	-5.12359	-6.42462	5/51	523,537,9114,9550,23545	ATP6V1A,ATP6AP1,ATP6V0D1,ATP6V1G1,ATP6V0A2
1_Member	KEGG Pathway	hsa05110	Vibrio cholerae infection	-5.12359	-6.42462	5/51	523,537,9114,9550,23545	ATP6V1A,ATP6AP1,ATP6V0D1,ATP6V1G1,ATP6V0A2
1_Member	GO Biological Processes	GO:0007169	transmembrane receptor protein tyrosine kinase signaling pathway	-5.08994	-6.41216	17/928	523,537,1793,2066,2246,3091,3320,4763,5125,5770,5777,7248,7249,9114,9550,23545,26230	ATP6V1A,ATP6AP1,DOCK1,ERBB4,FGF1,HIF1A,HSP90AA1,NF1,PCSK5,PTPN1,PTPN6,TSC1,TSC2,ATP6V0D1,ATP6V1G1,ATP6V0A2,TIAM2
1_Member	GO Biological Processes	GO:0055072	iron ion homeostasis	-4.95777	-6.3002	6/94	523,537,3091,9114,9550,23545	ATP6V1A,ATP6AP1,HIF1A,ATP6V0D1,ATP6V1G1,ATP6V0A2
1_Member	KEGG Pathway	hsa04966	Collecting duct acid secretion	-4.91685	-6.27858	4/27	523,9114,9550,23545	ATP6V1A,ATP6V0D1,ATP6V1G1,ATP6V0A2
1_Member	GO Biological Processes	GO:0010243	response to organonitrogen compound	-4.89275	-6.27296	17/961	523,537,790,2066,2246,3091,4763,5770,5777,6263,7248,7249,7490,9114,9550,23545,221935	ATP6V1A,ATP6AP1,CAD,ERBB4,FGF1,HIF1A,NF1,PTPN1,PTPN6,RYR3,TSC1,TSC2,WT1,ATP6V0D1,ATP6V1G1,ATP6V0A2,SDK1
1_Member	GO Biological Processes	GO:0043434	response to peptide hormone	-4.77794	-6.17588	13/594	523,537,2066,2246,3091,4763,5770,5777,7248,7249,9114,9550,23545	ATP6V1A,ATP6AP1,ERBB4,FGF1,HIF1A,NF1,PTPN1,PTPN6,TSC1,TSC2,ATP6V0D1,ATP6V1G1,ATP6V0A2
1_Member	KEGG Pathway	hsa04721	Synaptic vesicle cycle	-4.66964	-6.1214	5/63	523,1213,9114,9550,23545	ATP6V1A,CLTC,ATP6V0D1,ATP6V1G1,ATP6V0A2
1_Member	GO Biological Processes	GO:0046916	cellular transition metal ion homeostasis	-4.659	-6.1214	6/106	523,537,3091,9114,9550,23545	ATP6V1A,ATP6AP1,HIF1A,ATP6V0D1,ATP6V1G1,ATP6V0A2
1_Member	GO Biological Processes	GO:0015991	ATP hydrolysis coupled proton transport	-4.61421	-6.11936	4/32	523,537,9114,23545	ATP6V1A,ATP6AP1,ATP6V0D1,ATP6V0A2
1_Member	GO Biological Processes	GO:0015988	energy coupled proton transmembrane transport, against electrochemical gradient	-4.61421	-6.11936	4/32	523,537,9114,23545	ATP6V1A,ATP6AP1,ATP6V0D1,ATP6V0A2
1_Member	GO Biological Processes	GO:0000041	transition metal ion transport	-4.59014	-6.10865	6/109	523,537,1213,9114,9550,23545	ATP6V1A,ATP6AP1,CLTC,ATP6V0D1,ATP6V1G1,ATP6V0A2
1_Member	GO Biological Processes	GO:1901652	response to peptide	-4.51882	-6.06396	13/629	523,537,2066,2246,3091,4763,5770,5777,7248,7249,9114,9550,23545	ATP6V1A,ATP6AP1,ERBB4,FGF1,HIF1A,NF1,PTPN1,PTPN6,TSC1,TSC2,ATP6V0D1,ATP6V1G1,ATP6V0A2
1_Member	KEGG Pathway	ko05120	Epithelial cell signaling in Helicobacter pylori infection	-4.50766	-6.06396	5/68	523,537,9114,9550,23545	ATP6V1A,ATP6AP1,ATP6V0D1,ATP6V1G1,ATP6V0A2
1_Member	KEGG Pathway	hsa05120	Epithelial cell signaling in Helicobacter pylori infection	-4.50766	-6.06396	5/68	523,537,9114,9550,23545	ATP6V1A,ATP6AP1,ATP6V0D1,ATP6V1G1,ATP6V0A2
1_Member	GO Biological Processes	GO:0090662	ATP hydrolysis coupled transmembrane transport	-4.40699	-5.98678	4/36	523,537,9114,23545	ATP6V1A,ATP6AP1,ATP6V0D1,ATP6V0A2
1_Member	GO Biological Processes	GO:0010506	regulation of autophagy	-4.27287	-5.86393	8/247	523,665,1201,3091,7248,9114,9550,23545	ATP6V1A,BNIP3L,CLN3,HIF1A,TSC1,ATP6V0D1,ATP6V1G1,ATP6V0A2
1_Member	GO Biological Processes	GO:0055076	transition metal ion homeostasis	-4.1053	-5.73072	6/133	523,537,3091,9114,9550,23545	ATP6V1A,ATP6AP1,HIF1A,ATP6V0D1,ATP6V1G1,ATP6V0A2
1_Member	KEGG Pathway	hsa05323	Rheumatoid arthritis	-3.94606	-5.6273	5/89	523,537,9114,9550,23545	ATP6V1A,ATP6AP1,ATP6V0D1,ATP6V1G1,ATP6V0A2
1_Member	GO Biological Processes	GO:0006875	cellular metal ion homeostasis	-3.61666	-5.34093	10/479	523,537,1201,3091,5777,6263,9114,9550,23545,126306	ATP6V1A,ATP6AP1,CLN3,HIF1A,PTPN6,RYR3,ATP6V0D1,ATP6V1G1,ATP6V0A2,JSRP1
1_Member	GO Biological Processes	GO:1902600	hydrogen ion transmembrane transport	-3.58951	-5.32895	5/106	523,537,9114,9550,23545	ATP6V1A,ATP6AP1,ATP6V0D1,ATP6V1G1,ATP6V0A2
1_Member	GO Biological Processes	GO:0030003	cellular cation homeostasis	-3.34842	-5.16228	10/518	523,537,1201,3091,5777,6263,9114,9550,23545,126306	ATP6V1A,ATP6AP1,CLN3,HIF1A,PTPN6,RYR3,ATP6V0D1,ATP6V1G1,ATP6V0A2,JSRP1
1_Member	GO Biological Processes	GO:0031329	regulation of cellular catabolic process	-3.31467	-5.15352	11/622	523,665,1201,3091,5770,7248,9114,9550,23545,51594,54583	ATP6V1A,BNIP3L,CLN3,HIF1A,PTPN1,TSC1,ATP6V0D1,ATP6V1G1,ATP6V0A2,NBAS,EGLN1
1_Member	GO Biological Processes	GO:0009894	regulation of catabolic process	-3.30545	-5.15055	12/727	523,665,1201,2719,3091,5770,7248,9114,9550,23545,51594,54583	ATP6V1A,BNIP3L,CLN3,GPC3,HIF1A,PTPN1,TSC1,ATP6V0D1,ATP6V1G1,ATP6V0A2,NBAS,EGLN1
1_Member	KEGG Pathway	hsa04142	Lysosome	-3.29175	-5.143	5/123	537,1201,1213,9114,23545	ATP6AP1,CLN3,CLTC,ATP6V0D1,ATP6V0A2
1_Member	GO Biological Processes	GO:0006873	cellular ion homeostasis	-3.26477	-5.12809	10/531	523,537,1201,3091,5777,6263,9114,9550,23545,126306	ATP6V1A,ATP6AP1,CLN3,HIF1A,PTPN6,RYR3,ATP6V0D1,ATP6V1G1,ATP6V0A2,JSRP1
1_Member	GO Biological Processes	GO:0045851	pH reduction	-3.22874	-5.1038	3/31	537,1201,23545	ATP6AP1,CLN3,ATP6V0A2
1_Member	GO Biological Processes	GO:0055065	metal ion homeostasis	-3.19606	-5.08164	10/542	523,537,1201,3091,5777,6263,9114,9550,23545,126306	ATP6V1A,ATP6AP1,CLN3,HIF1A,PTPN6,RYR3,ATP6V0D1,ATP6V1G1,ATP6V0A2,JSRP1
1_Member	GO Biological Processes	GO:0055082	cellular chemical homeostasis	-3.14007	-5.04063	11/653	523,537,1201,3091,5777,6263,9114,9550,23545,55638,126306	ATP6V1A,ATP6AP1,CLN3,HIF1A,PTPN6,RYR3,ATP6V0D1,ATP6V1G1,ATP6V0A2,SYBU,JSRP1
1_Member	KEGG Pathway	hsa00190	Oxidative phosphorylation	-3.13754	-5.04063	5/133	523,537,9114,9550,23545	ATP6V1A,ATP6AP1,ATP6V0D1,ATP6V1G1,ATP6V0A2
1_Member	GO Biological Processes	GO:0019725	cellular homeostasis	-3.02848	-4.95793	12/782	523,537,1201,3091,3783,5777,6263,9114,9550,23545,55638,126306	ATP6V1A,ATP6AP1,CLN3,HIF1A,KCNN4,PTPN6,RYR3,ATP6V0D1,ATP6V1G1,ATP6V0A2,SYBU,JSRP1
1_Member	GO Biological Processes	GO:0015992	proton transport	-2.94254	-4.90251	5/147	523,537,9114,9550,23545	ATP6V1A,ATP6AP1,ATP6V0D1,ATP6V1G1,ATP6V0A2
1_Member	GO Biological Processes	GO:0006818	hydrogen transport	-2.91643	-4.88879	5/149	523,537,9114,9550,23545	ATP6V1A,ATP6AP1,ATP6V0D1,ATP6V1G1,ATP6V0A2
1_Member	GO Biological Processes	GO:0055080	cation homeostasis	-2.91107	-4.88879	10/591	523,537,1201,3091,5777,6263,9114,9550,23545,126306	ATP6V1A,ATP6AP1,CLN3,HIF1A,PTPN6,RYR3,ATP6V0D1,ATP6V1G1,ATP6V0A2,JSRP1
1_Member	KEGG Pathway	hsa04145	Phagosome	-2.8654	-4.86104	5/153	523,537,9114,9550,23545	ATP6V1A,ATP6AP1,ATP6V0D1,ATP6V1G1,ATP6V0A2
1_Member	GO Biological Processes	GO:0016236	macroautophagy	-2.84231	-4.8541	8/404	523,665,1201,3091,7248,9114,9550,23545	ATP6V1A,BNIP3L,CLN3,HIF1A,TSC1,ATP6V0D1,ATP6V1G1,ATP6V0A2
1_Member	GO Biological Processes	GO:0098771	inorganic ion homeostasis	-2.84076	-4.8541	10/604	523,537,1201,3091,5777,6263,9114,9550,23545,126306	ATP6V1A,ATP6AP1,CLN3,HIF1A,PTPN6,RYR3,ATP6V0D1,ATP6V1G1,ATP6V0A2,JSRP1
1_Member	GO Biological Processes	GO:0045454	cell redox homeostasis	-2.83012	-4.8541	4/92	523,9114,9550,23545	ATP6V1A,ATP6V0D1,ATP6V1G1,ATP6V0A2
1_Member	GO Biological Processes	GO:0048878	chemical homeostasis	-2.63737	-4.72016	13/989	523,537,1201,3091,5777,6263,9114,9550,10062,23545,54583,55638,126306	ATP6V1A,ATP6AP1,CLN3,HIF1A,PTPN6,RYR3,ATP6V0D1,ATP6V1G1,NR1H3,ATP6V0A2,EGLN1,SYBU,JSRP1
1_Member	GO Biological Processes	GO:0031667	response to nutrient levels	-2.55349	-4.6573	9/553	523,665,1201,3091,7248,8131,9114,9550,23545	ATP6V1A,BNIP3L,CLN3,HIF1A,TSC1,NPRL3,ATP6V0D1,ATP6V1G1,ATP6V0A2
1_Member	GO Biological Processes	GO:0050801	ion homeostasis	-2.54137	-4.64858	10/664	523,537,1201,3091,5777,6263,9114,9550,23545,126306	ATP6V1A,ATP6AP1,CLN3,HIF1A,PTPN6,RYR3,ATP6V0D1,ATP6V1G1,ATP6V0A2,JSRP1
1_Member	GO Biological Processes	GO:0080135	regulation of cellular response to stress	-2.46336	-4.60324	10/681	523,665,1201,3091,3320,5770,7248,9114,9550,23545	ATP6V1A,BNIP3L,CLN3,HIF1A,HSP90AA1,PTPN1,TSC1,ATP6V0D1,ATP6V1G1,ATP6V0A2
1_Member	GO Biological Processes	GO:0006914	autophagy	-2.45668	-4.5997	9/572	523,665,1201,3091,3320,7248,9114,9550,23545	ATP6V1A,BNIP3L,CLN3,HIF1A,HSP90AA1,TSC1,ATP6V0D1,ATP6V1G1,ATP6V0A2
1_Member	GO Biological Processes	GO:0009991	response to extracellular stimulus	-2.42213	-4.56862	9/579	523,665,1201,3091,7248,8131,9114,9550,23545	ATP6V1A,BNIP3L,CLN3,HIF1A,TSC1,NPRL3,ATP6V0D1,ATP6V1G1,ATP6V0A2
1_Member	GO Biological Processes	GO:0006885	regulation of pH	-2.22572	-4.45872	3/69	537,1201,23545	ATP6AP1,CLN3,ATP6V0A2
2_Summary	Canonical Pathways	M180	PID HIF1A PATHWAY	-7.37011	-7.97217	5/19	3091,3320,7428,8453,54583,665,7248,4763,2246,6688,29119,5125,8131	HIF1A,HSP90AA1,VHL,CUL2,EGLN1,BNIP3L,TSC1,NF1,FGF1,SPI1,CTNNA3,PCSK5,NPRL3
2_Member	Canonical Pathways	M180	PID HIF1A PATHWAY	-7.37011	-7.97217	5/19	3091,3320,7428,8453,54583	HIF1A,HSP90AA1,VHL,CUL2,EGLN1
2_Member	GO Biological Processes	GO:0061418	regulation of transcription from RNA polymerase II promoter in response to hypoxia	-4.61421	-6.11936	4/32	3091,7428,8453,54583	HIF1A,VHL,CUL2,EGLN1
2_Member	GO Biological Processes	GO:0036294	cellular response to decreased oxygen levels	-3.94828	-5.6273	6/142	665,3091,7248,7428,8453,54583	BNIP3L,HIF1A,TSC1,VHL,CUL2,EGLN1
2_Member	GO Biological Processes	GO:0071453	cellular response to oxygen levels	-3.81787	-5.52545	6/150	665,3091,7248,7428,8453,54583	BNIP3L,HIF1A,TSC1,VHL,CUL2,EGLN1
2_Member	GO Biological Processes	GO:0043618	regulation of transcription from RNA polymerase II promoter in response to stress	-3.4768	-5.24211	4/62	3091,7428,8453,54583	HIF1A,VHL,CUL2,EGLN1
2_Member	KEGG Pathway	hsa05211	Renal cell carcinoma	-3.37264	-5.16503	4/66	3091,7428,8453,54583	HIF1A,VHL,CUL2,EGLN1
2_Member	GO Biological Processes	GO:0043620	regulation of DNA-templated transcription in response to stress	-3.34768	-5.16228	4/67	3091,7428,8453,54583	HIF1A,VHL,CUL2,EGLN1
2_Member	GO Biological Processes	GO:0071456	cellular response to hypoxia	-3.10828	-5.01676	5/135	665,3091,7428,8453,54583	BNIP3L,HIF1A,VHL,CUL2,EGLN1
2_Member	GO Biological Processes	GO:0036293	response to decreased oxygen levels	-2.94858	-4.90282	7/300	665,3091,4763,7248,7428,8453,54583	BNIP3L,HIF1A,NF1,TSC1,VHL,CUL2,EGLN1
2_Member	KEGG Pathway	hsa05200	Pathways in cancer	-2.8903	-4.87707	8/397	2246,3091,3320,6688,7428,8453,29119,54583	FGF1,HIF1A,HSP90AA1,SPI1,VHL,CUL2,CTNNA3,EGLN1
2_Member	GO Biological Processes	GO:0070482	response to oxygen levels	-2.8113	-4.84767	7/317	665,3091,4763,7248,7428,8453,54583	BNIP3L,HIF1A,NF1,TSC1,VHL,CUL2,EGLN1
2_Member	KEGG Pathway	hsa04066	HIF-1 signaling pathway	-2.65022	-4.7294	4/103	3091,7428,8453,54583	HIF1A,VHL,CUL2,EGLN1
2_Member	GO Biological Processes	GO:0001666	response to hypoxia	-2.33127	-4.50524	6/291	665,3091,4763,7428,8453,54583	BNIP3L,HIF1A,NF1,VHL,CUL2,EGLN1
2_Member	GO Biological Processes	GO:0003205	cardiac chamber development	-2.13277	-4.39994	4/144	3091,5125,8131,54583	HIF1A,PCSK5,NPRL3,EGLN1
3_Summary	GO Biological Processes	GO:0098660	inorganic ion transmembrane transport	-5.19135	-6.42462	15/720	523,537,1186,1192,1804,3781,3783,5777,6263,9114,9550,23545,80333,93589,126306,1213,7248	ATP6V1A,ATP6AP1,CLCN7,CLIC1,DPP6,KCNN2,KCNN4,PTPN6,RYR3,ATP6V0D1,ATP6V1G1,ATP6V0A2,KCNIP4,CACNA2D4,JSRP1,CLTC,TSC1
3_Member	GO Biological Processes	GO:0098660	inorganic ion transmembrane transport	-5.19135	-6.42462	15/720	523,537,1186,1192,1804,3781,3783,5777,6263,9114,9550,23545,80333,93589,126306	ATP6V1A,ATP6AP1,CLCN7,CLIC1,DPP6,KCNN2,KCNN4,PTPN6,RYR3,ATP6V0D1,ATP6V1G1,ATP6V0A2,KCNIP4,CACNA2D4,JSRP1
3_Member	GO Biological Processes	GO:0030001	metal ion transport	-4.67726	-6.1214	15/796	523,537,1213,1804,3781,3783,5777,6263,7248,9114,9550,23545,80333,93589,126306	ATP6V1A,ATP6AP1,CLTC,DPP6,KCNN2,KCNN4,PTPN6,RYR3,TSC1,ATP6V0D1,ATP6V1G1,ATP6V0A2,KCNIP4,CACNA2D4,JSRP1
3_Member	GO Biological Processes	GO:0098662	inorganic cation transmembrane transport	-4.48331	-6.05151	13/634	523,537,1804,3781,3783,5777,6263,9114,9550,23545,80333,93589,126306	ATP6V1A,ATP6AP1,DPP6,KCNN2,KCNN4,PTPN6,RYR3,ATP6V0D1,ATP6V1G1,ATP6V0A2,KCNIP4,CACNA2D4,JSRP1
3_Member	GO Biological Processes	GO:0098655	cation transmembrane transport	-4.05857	-5.71178	13/698	523,537,1804,3781,3783,5777,6263,9114,9550,23545,80333,93589,126306	ATP6V1A,ATP6AP1,DPP6,KCNN2,KCNN4,PTPN6,RYR3,ATP6V0D1,ATP6V1G1,ATP6V0A2,KCNIP4,CACNA2D4,JSRP1
3_Member	GO Biological Processes	GO:0015672	monovalent inorganic cation transport	-3.04074	-4.96044	10/568	523,537,1804,3781,3783,7248,9114,9550,23545,80333	ATP6V1A,ATP6AP1,DPP6,KCNN2,KCNN4,TSC1,ATP6V0D1,ATP6V1G1,ATP6V0A2,KCNIP4
3_Member	GO Biological Processes	GO:0034765	regulation of ion transmembrane transport	-2.82879	-4.8541	8/406	1186,1192,1804,3781,5777,80333,93589,126306	CLCN7,CLIC1,DPP6,KCNN2,PTPN6,KCNIP4,CACNA2D4,JSRP1
3_Member	GO Biological Processes	GO:0034762	regulation of transmembrane transport	-2.72366	-4.77288	8/422	1186,1192,1804,3781,5777,80333,93589,126306	CLCN7,CLIC1,DPP6,KCNN2,PTPN6,KCNIP4,CACNA2D4,JSRP1
3_Member	GO Biological Processes	GO:1901379	regulation of potassium ion transmembrane transport	-2.39573	-4.55709	3/60	1804,3781,80333	DPP6,KCNN2,KCNIP4
3_Member	GO Biological Processes	GO:1904062	regulation of cation transmembrane transport	-2.31712	-4.50524	5/205	1804,3781,5777,80333,126306	DPP6,KCNN2,PTPN6,KCNIP4,JSRP1
3_Member	GO Biological Processes	GO:0006813	potassium ion transport	-2.25617	-4.48148	5/212	1804,3781,3783,7248,80333	DPP6,KCNN2,KCNN4,TSC1,KCNIP4
3_Member	GO Biological Processes	GO:0010959	regulation of metal ion transport	-2.11616	-4.388	6/323	1804,3781,5777,80333,93589,126306	DPP6,KCNN2,PTPN6,KCNIP4,CACNA2D4,JSRP1
3_Member	GO Biological Processes	GO:0043266	regulation of potassium ion transport	-2.01937	-4.33323	3/82	1804,3781,80333	DPP6,KCNN2,KCNIP4
4_Summary	GO Biological Processes	GO:0032007	negative regulation of TOR signaling	-4.72864	-6.14361	4/30	3091,7248,7249,8131,2066,5770,11019,4763,3320,5777	HIF1A,TSC1,TSC2,NPRL3,ERBB4,PTPN1,LIAS,NF1,HSP90AA1,PTPN6
4_Member	GO Biological Processes	GO:0032007	negative regulation of TOR signaling	-4.72864	-6.14361	4/30	3091,7248,7249,8131	HIF1A,TSC1,TSC2,NPRL3
4_Member	Canonical Pathways	M295	SIG PIP3 SIGNALING IN CARDIAC MYOCTES	-3.34768	-5.16228	4/67	2066,5770,7248,7249	ERBB4,PTPN1,TSC1,TSC2
4_Member	GO Biological Processes	GO:0032006	regulation of TOR signaling	-3.32312	-5.15352	4/68	3091,7248,7249,8131	HIF1A,TSC1,TSC2,NPRL3
4_Member	GO Biological Processes	GO:0046627	negative regulation of insulin receptor signaling pathway	-3.31534	-5.15352	3/29	5770,7248,7249	PTPN1,TSC1,TSC2
4_Member	GO Biological Processes	GO:1900077	negative regulation of cellular response to insulin stimulus	-3.22874	-5.1038	3/31	5770,7248,7249	PTPN1,TSC1,TSC2
4_Member	GO Biological Processes	GO:0031929	TOR signaling	-3.05609	-4.9699	4/80	3091,7248,7249,8131	HIF1A,TSC1,TSC2,NPRL3
4_Member	GO Biological Processes	GO:0014020	primary neural tube formation	-2.93872	-4.90251	4/86	3091,7248,7249,11019	HIF1A,TSC1,TSC2,LIAS
4_Member	GO Biological Processes	GO:0021915	neural tube development	-2.89072	-4.87707	5/151	3091,4763,7248,7249,11019	HIF1A,NF1,TSC1,TSC2,LIAS
4_Member	GO Biological Processes	GO:0046626	regulation of insulin receptor signaling pathway	-2.81024	-4.84767	3/43	5770,7248,7249	PTPN1,TSC1,TSC2
4_Member	GO Biological Processes	GO:0001841	neural tube formation	-2.77876	-4.82015	4/95	3091,7248,7249,11019	HIF1A,TSC1,TSC2,LIAS
4_Member	Canonical Pathways	M87	PID LKB1 PATHWAY	-2.69837	-4.76213	3/47	3320,7248,7249	HSP90AA1,TSC1,TSC2
4_Member	GO Biological Processes	GO:0001838	embryonic epithelial tube formation	-2.4772	-4.61074	4/115	3091,7248,7249,11019	HIF1A,TSC1,TSC2,LIAS
4_Member	GO Biological Processes	GO:0072175	epithelial tube formation	-2.46372	-4.60324	4/116	3091,7248,7249,11019	HIF1A,TSC1,TSC2,LIAS
4_Member	GO Biological Processes	GO:1900076	regulation of cellular response to insulin stimulus	-2.41633	-4.56862	3/59	5770,7248,7249	PTPN1,TSC1,TSC2
4_Member	KEGG Pathway	hsa04150	mTOR signaling pathway	-2.39573	-4.55709	3/60	3091,7248,7249	HIF1A,TSC1,TSC2
4_Member	GO Biological Processes	GO:0035148	tube formation	-2.27619	-4.49367	4/131	3091,7248,7249,11019	HIF1A,TSC1,TSC2,LIAS
4_Member	GO Biological Processes	GO:0016331	morphogenesis of embryonic epithelium	-2.16448	-4.41485	4/141	3091,7248,7249,11019	HIF1A,TSC1,TSC2,LIAS
4_Member	GO Biological Processes	GO:1902532	negative regulation of intracellular signal transduction	-2.03665	-4.34139	7/440	3091,4763,5770,5777,7248,7249,8131	HIF1A,NF1,PTPN1,PTPN6,TSC1,TSC2,NPRL3
4_Member	GO Biological Processes	GO:0001843	neural tube closure	-2.01937	-4.33323	3/82	7248,7249,11019	TSC1,TSC2,LIAS
4_Member	GO Biological Processes	GO:0060606	tube closure	-2.00504	-4.32532	3/83	7248,7249,11019	TSC1,TSC2,LIAS
5_Summary	GO Biological Processes	GO:0007507	heart development	-4.2347	-5.83676	11/487	790,2066,2719,3091,4763,5125,7248,7249,7490,8131,54583,2246,6688,11019,2028,1793,3320,5770,221935,64115,26230	CAD,ERBB4,GPC3,HIF1A,NF1,PCSK5,TSC1,TSC2,WT1,NPRL3,EGLN1,FGF1,SPI1,LIAS,ENPEP,DOCK1,HSP90AA1,PTPN1,SDK1,C10orf54,TIAM2
5_Member	GO Biological Processes	GO:0007507	heart development	-4.2347	-5.83676	11/487	790,2066,2719,3091,4763,5125,7248,7249,7490,8131,54583	CAD,ERBB4,GPC3,HIF1A,NF1,PCSK5,TSC1,TSC2,WT1,NPRL3,EGLN1
5_Member	GO Biological Processes	GO:0060562	epithelial tube morphogenesis	-3.6797	-5.3957	8/301	2246,2719,3091,6688,7248,7249,7490,11019	FGF1,GPC3,HIF1A,SPI1,TSC1,TSC2,WT1,LIAS
5_Member	GO Biological Processes	GO:0072359	circulatory system development	-3.45678	-5.24211	14/913	790,2028,2066,2246,2719,3091,4763,5125,6688,7248,7249,7490,8131,54583	CAD,ENPEP,ERBB4,FGF1,GPC3,HIF1A,NF1,PCSK5,SPI1,TSC1,TSC2,WT1,NPRL3,EGLN1
5_Member	GO Biological Processes	GO:0072358	cardiovascular system development	-3.45678	-5.24211	14/913	790,2028,2066,2246,2719,3091,4763,5125,6688,7248,7249,7490,8131,54583	CAD,ENPEP,ERBB4,FGF1,GPC3,HIF1A,NF1,PCSK5,SPI1,TSC1,TSC2,WT1,NPRL3,EGLN1
5_Member	GO Biological Processes	GO:0035239	tube morphogenesis	-3.34274	-5.16228	8/338	2246,2719,3091,6688,7248,7249,7490,11019	FGF1,GPC3,HIF1A,SPI1,TSC1,TSC2,WT1,LIAS
5_Member	GO Biological Processes	GO:0001822	kidney development	-3.28346	-5.14079	7/263	2028,2246,2719,4763,5125,7248,7490	ENPEP,FGF1,GPC3,NF1,PCSK5,TSC1,WT1
5_Member	GO Biological Processes	GO:0072001	renal system development	-3.15037	-5.04246	7/277	2028,2246,2719,4763,5125,7248,7490	ENPEP,FGF1,GPC3,NF1,PCSK5,TSC1,WT1
5_Member	GO Biological Processes	GO:0001568	blood vessel development	-3.02343	-4.95793	10/571	2028,2246,2719,3091,4763,5125,6688,7490,8131,54583	ENPEP,FGF1,GPC3,HIF1A,NF1,PCSK5,SPI1,WT1,NPRL3,EGLN1
5_Member	GO Biological Processes	GO:0035295	tube development	-3.01196	-4.95148	10/573	2246,2719,3091,4763,5125,6688,7248,7249,7490,11019	FGF1,GPC3,HIF1A,NF1,PCSK5,SPI1,TSC1,TSC2,WT1,LIAS
5_Member	GO Biological Processes	GO:0048010	vascular endothelial growth factor receptor signaling pathway	-2.98228	-4.92725	7/296	1793,2066,2246,3091,3320,4763,5770	DOCK1,ERBB4,FGF1,HIF1A,HSP90AA1,NF1,PTPN1
5_Member	GO Biological Processes	GO:0048729	tissue morphogenesis	-2.97786	-4.92725	10/579	2246,2719,3091,6688,7248,7249,7490,11019,54583,221935	FGF1,GPC3,HIF1A,SPI1,TSC1,TSC2,WT1,LIAS,EGLN1,SDK1
5_Member	GO Biological Processes	GO:0001944	vasculature development	-2.91107	-4.88879	10/591	2028,2246,2719,3091,4763,5125,6688,7490,8131,54583	ENPEP,FGF1,GPC3,HIF1A,NF1,PCSK5,SPI1,WT1,NPRL3,EGLN1
5_Member	GO Biological Processes	GO:0001655	urogenital system development	-2.83485	-4.8541	7/314	2028,2246,2719,4763,5125,7248,7490	ENPEP,FGF1,GPC3,NF1,PCSK5,TSC1,WT1
5_Member	GO Biological Processes	GO:0002009	morphogenesis of an epithelium	-2.55756	-4.6573	8/449	2246,2719,3091,6688,7248,7249,7490,11019	FGF1,GPC3,HIF1A,SPI1,TSC1,TSC2,WT1,LIAS
5_Member	GO Biological Processes	GO:0001658	branching involved in ureteric bud morphogenesis	-2.41633	-4.56862	3/59	2246,2719,7490	FGF1,GPC3,WT1
5_Member	GO Biological Processes	GO:0048514	blood vessel morphogenesis	-2.35031	-4.51763	8/486	2028,2246,3091,4763,6688,7490,8131,54583	ENPEP,FGF1,HIF1A,NF1,SPI1,WT1,NPRL3,EGLN1
5_Member	GO Biological Processes	GO:0060675	ureteric bud morphogenesis	-2.31691	-4.50524	3/64	2246,2719,7490	FGF1,GPC3,WT1
5_Member	GO Biological Processes	GO:0072171	mesonephric tubule morphogenesis	-2.29806	-4.50524	3/65	2246,2719,7490	FGF1,GPC3,WT1
5_Member	GO Biological Processes	GO:0072006	nephron development	-2.26458	-4.48729	4/132	2028,2246,2719,7490	ENPEP,FGF1,GPC3,WT1
5_Member	GO Biological Processes	GO:0072078	nephron tubule morphogenesis	-2.15789	-4.41485	3/73	2246,2719,7490	FGF1,GPC3,WT1
5_Member	GO Biological Processes	GO:0072088	nephron epithelium morphogenesis	-2.12552	-4.39503	3/75	2246,2719,7490	FGF1,GPC3,WT1
5_Member	GO Biological Processes	GO:0048754	branching morphogenesis of an epithelial tube	-2.10183	-4.37598	4/147	2246,2719,6688,7490	FGF1,GPC3,SPI1,WT1
5_Member	GO Biological Processes	GO:1901342	regulation of vasculature development	-2.09474	-4.37512	5/232	2246,3091,4763,7490,54583	FGF1,HIF1A,NF1,WT1,EGLN1
5_Member	GO Biological Processes	GO:0061333	renal tubule morphogenesis	-2.09409	-4.37512	3/77	2246,2719,7490	FGF1,GPC3,WT1
5_Member	GO Biological Processes	GO:0072028	nephron morphogenesis	-2.09409	-4.37512	3/77	2246,2719,7490	FGF1,GPC3,WT1
5_Member	GO Biological Processes	GO:0007389	pattern specification process	-2.07268	-4.36494	7/433	2066,2246,2719,3091,5125,6688,7490	ERBB4,FGF1,GPC3,HIF1A,PCSK5,SPI1,WT1
5_Member	GO Biological Processes	GO:0090287	regulation of cellular response to growth factor stimulus	-2.04963	-4.34849	5/238	2246,2719,3091,5770,64115	FGF1,GPC3,HIF1A,PTPN1,C10orf54
5_Member	GO Biological Processes	GO:0071363	cellular response to growth factor stimulus	-2.02749	-4.33712	11/913	790,2066,2246,2719,3091,4763,5125,5770,7249,26230,64115	CAD,ERBB4,FGF1,GPC3,HIF1A,NF1,PCSK5,PTPN1,TSC2,TIAM2,C10orf54
6_Summary	GO Biological Processes	GO:0046782	regulation of viral transcription	-4.16677	-5.77955	5/80	6749,7469,10410,11198,51497	SSRP1,NELFA,IFITM3,SUPT16H,NELFCD
6_Member	GO Biological Processes	GO:0046782	regulation of viral transcription	-4.16677	-5.77955	5/80	6749,7469,10410,11198,51497	SSRP1,NELFA,IFITM3,SUPT16H,NELFCD
6_Member	GO Biological Processes	GO:0050434	positive regulation of viral transcription	-3.58858	-5.32895	4/58	6749,7469,11198,51497	SSRP1,NELFA,SUPT16H,NELFCD
6_Member	GO Biological Processes	GO:0006368	transcription elongation from RNA polymerase II promoter	-2.8128	-4.84767	4/93	6749,7469,11198,51497	SSRP1,NELFA,SUPT16H,NELFCD
6_Member	GO Biological Processes	GO:1903902	positive regulation of viral life cycle	-2.61984	-4.71327	4/105	6749,7469,11198,51497	SSRP1,NELFA,SUPT16H,NELFCD
6_Member	GO Biological Processes	GO:0048524	positive regulation of viral process	-2.5325	-4.64364	4/111	6749,7469,11198,51497	SSRP1,NELFA,SUPT16H,NELFCD
6_Member	GO Biological Processes	GO:1903900	regulation of viral life cycle	-2.48615	-4.61326	5/187	6749,7469,10410,11198,51497	SSRP1,NELFA,IFITM3,SUPT16H,NELFCD
6_Member	GO Biological Processes	GO:0019083	viral transcription	-2.40872	-4.56406	5/195	6749,7469,10410,11198,51497	SSRP1,NELFA,IFITM3,SUPT16H,NELFCD
6_Member	GO Biological Processes	GO:0050792	regulation of viral process	-2.36223	-4.52658	5/200	6749,7469,10410,11198,51497	SSRP1,NELFA,IFITM3,SUPT16H,NELFCD
6_Member	GO Biological Processes	GO:0019080	viral gene expression	-2.30826	-4.50524	5/206	6749,7469,10410,11198,51497	SSRP1,NELFA,IFITM3,SUPT16H,NELFCD
6_Member	GO Biological Processes	GO:0006354	DNA-templated transcription, elongation	-2.26458	-4.48729	4/132	6749,7469,11198,51497	SSRP1,NELFA,SUPT16H,NELFCD
6_Member	GO Biological Processes	GO:0044033	multi-organism metabolic process	-2.23079	-4.45872	5/215	6749,7469,10410,11198,51497	SSRP1,NELFA,IFITM3,SUPT16H,NELFCD
6_Member	GO Biological Processes	GO:0043903	regulation of symbiosis, encompassing mutualism through parasitism	-2.15717	-4.41485	5/224	6749,7469,10410,11198,51497	SSRP1,NELFA,IFITM3,SUPT16H,NELFCD
7_Summary	GO Biological Processes	GO:0032941	secretion by tissue	-4.09029	-5.73072	5/83	790,2066,3091,3783,10062,1192,1793,5770,5777,25970,6263,221935,523,4967,23545	CAD,ERBB4,HIF1A,KCNN4,NR1H3,CLIC1,DOCK1,PTPN1,PTPN6,SH2B1,RYR3,SDK1,ATP6V1A,OGDH,ATP6V0A2
7_Member	GO Biological Processes	GO:0032941	secretion by tissue	-4.09029	-5.73072	5/83	790,2066,3091,3783,10062	CAD,ERBB4,HIF1A,KCNN4,NR1H3
7_Member	GO Biological Processes	GO:0007589	body fluid secretion	-3.85575	-5.55472	5/93	790,2066,3091,3783,10062	CAD,ERBB4,HIF1A,KCNN4,NR1H3
7_Member	GO Biological Processes	GO:0007595	lactation	-2.83998	-4.8541	3/42	790,2066,3091	CAD,ERBB4,HIF1A
7_Member	GO Biological Processes	GO:0050878	regulation of body fluid levels	-2.3154	-4.50524	10/715	790,1192,1793,2066,3091,3783,5770,5777,10062,25970	CAD,CLIC1,DOCK1,ERBB4,HIF1A,KCNN4,PTPN1,PTPN6,NR1H3,SH2B1
7_Member	GO Biological Processes	GO:0043279	response to alkaloid	-2.20802	-4.44355	4/137	790,3091,6263,221935	CAD,HIF1A,RYR3,SDK1
7_Member	GO Biological Processes	GO:0009199	ribonucleoside triphosphate metabolic process	-2.14131	-4.40376	5/226	523,790,3091,4967,23545	ATP6V1A,CAD,HIF1A,OGDH,ATP6V0A2
8_Summary	GO Biological Processes	GO:0017148	negative regulation of translation	-4.08727	-5.73072	6/134	7248,7490,9125,23318,85451,389421,51386	TSC1,WT1,CNOT9,ZCCHC11,UNK,LIN28B,EIF3L
8_Member	GO Biological Processes	GO:0017148	negative regulation of translation	-4.08727	-5.73072	6/134	7248,7490,9125,23318,85451,389421	TSC1,WT1,CNOT9,ZCCHC11,UNK,LIN28B
8_Member	GO Biological Processes	GO:0034249	negative regulation of cellular amide metabolic process	-3.99934	-5.6621	6/139	7248,7490,9125,23318,85451,389421	TSC1,WT1,CNOT9,ZCCHC11,UNK,LIN28B
8_Member	GO Biological Processes	GO:0006417	regulation of translation	-2.74229	-4.78761	7/326	7248,7490,9125,23318,51386,85451,389421	TSC1,WT1,CNOT9,ZCCHC11,EIF3L,UNK,LIN28B
8_Member	GO Biological Processes	GO:0034248	regulation of cellular amide metabolic process	-2.5557	-4.6573	7/352	7248,7490,9125,23318,51386,85451,389421	TSC1,WT1,CNOT9,ZCCHC11,EIF3L,UNK,LIN28B
8_Member	GO Biological Processes	GO:0010608	posttranscriptional regulation of gene expression	-2.00638	-4.32532	7/446	7248,7490,9125,23318,51386,85451,389421	TSC1,WT1,CNOT9,ZCCHC11,EIF3L,UNK,LIN28B
9_Summary	GO Biological Processes	GO:0032844	regulation of homeostatic process	-3.88227	-5.57247	10/444	537,3091,4763,5777,6263,6688,10062,55638,126306,129138,2719	ATP6AP1,HIF1A,NF1,PTPN6,RYR3,SPI1,NR1H3,SYBU,JSRP1,ANKRD54,GPC3
9_Member	GO Biological Processes	GO:0032844	regulation of homeostatic process	-3.88227	-5.57247	10/444	537,3091,4763,5777,6263,6688,10062,55638,126306,129138	ATP6AP1,HIF1A,NF1,PTPN6,RYR3,SPI1,NR1H3,SYBU,JSRP1,ANKRD54
9_Member	GO Biological Processes	GO:0045646	regulation of erythrocyte differentiation	-3.03616	-4.96044	3/36	3091,6688,129138	HIF1A,SPI1,ANKRD54
9_Member	GO Biological Processes	GO:0030099	myeloid cell differentiation	-2.69025	-4.76213	7/333	537,2719,3091,4763,5777,6688,129138	ATP6AP1,GPC3,HIF1A,NF1,PTPN6,SPI1,ANKRD54
9_Member	GO Biological Processes	GO:0045637	regulation of myeloid cell differentiation	-2.52637	-4.64364	5/183	537,3091,4763,6688,129138	ATP6AP1,HIF1A,NF1,SPI1,ANKRD54
9_Member	GO Biological Processes	GO:1903706	regulation of hemopoiesis	-2.17381	-4.41873	6/314	537,3091,4763,5777,6688,129138	ATP6AP1,HIF1A,NF1,PTPN6,SPI1,ANKRD54
9_Member	GO Biological Processes	GO:0045639	positive regulation of myeloid cell differentiation	-2.03389	-4.34139	3/81	537,3091,129138	ATP6AP1,HIF1A,ANKRD54
10_Summary	GO Biological Processes	GO:0060334	regulation of interferon-gamma-mediated signaling pathway	-3.56349	-5.31168	3/24	5770,5777,10062,3091,4763,29119,1213,10410	PTPN1,PTPN6,NR1H3,HIF1A,NF1,CTNNA3,CLTC,IFITM3
10_Member	GO Biological Processes	GO:0060334	regulation of interferon-gamma-mediated signaling pathway	-3.56349	-5.31168	3/24	5770,5777,10062	PTPN1,PTPN6,NR1H3
10_Member	GO Biological Processes	GO:0060330	regulation of response to interferon-gamma	-3.50966	-5.26553	3/25	5770,5777,10062	PTPN1,PTPN6,NR1H3
10_Member	GO Biological Processes	GO:0001959	regulation of cytokine-mediated signaling pathway	-2.197	-4.43504	4/138	3091,5770,5777,10062	HIF1A,PTPN1,PTPN6,NR1H3
10_Member	GO Biological Processes	GO:0043407	negative regulation of MAP kinase activity	-2.15789	-4.41485	3/73	4763,5770,5777	NF1,PTPN1,PTPN6
10_Member	KEGG Pathway	hsa04520	Adherens junction	-2.14158	-4.40376	3/74	5770,5777,29119	PTPN1,PTPN6,CTNNA3
10_Member	GO Biological Processes	GO:0060759	regulation of response to cytokine stimulus	-2.13277	-4.39994	4/144	3091,5770,5777,10062	HIF1A,PTPN1,PTPN6,NR1H3
10_Member	GO Biological Processes	GO:0043112	receptor metabolic process	-2.08161	-4.36875	4/149	1213,3091,5770,10062	CLTC,HIF1A,PTPN1,NR1H3
10_Member	GO Biological Processes	GO:0071357	cellular response to type I interferon	-2.03389	-4.34139	3/81	5770,5777,10410	PTPN1,PTPN6,IFITM3
10_Member	GO Biological Processes	GO:0060337	type I interferon signaling pathway	-2.03389	-4.34139	3/81	5770,5777,10410	PTPN1,PTPN6,IFITM3
11_Summary	GO Biological Processes	GO:0046487	glyoxylate metabolic process	-3.45809	-5.24211	3/26	2731,4967,11019	GLDC,OGDH,LIAS
11_Member	GO Biological Processes	GO:0046487	glyoxylate metabolic process	-3.45809	-5.24211	3/26	2731,4967,11019	GLDC,OGDH,LIAS
12_Summary	GO Biological Processes	GO:0008285	negative regulation of cell proliferation	-3.19514	-5.08164	11/643	2066,2719,4763,5777,7248,7249,7428,7490,7940,8453,64115,8131,54583	ERBB4,GPC3,NF1,PTPN6,TSC1,TSC2,VHL,WT1,LST1,CUL2,C10orf54,NPRL3,EGLN1
12_Member	GO Biological Processes	GO:0008285	negative regulation of cell proliferation	-3.19514	-5.08164	11/643	2066,2719,4763,5777,7248,7249,7428,7490,7940,8453,64115	ERBB4,GPC3,NF1,PTPN6,TSC1,TSC2,VHL,WT1,LST1,CUL2,C10orf54
12_Member	GO Biological Processes	GO:0048738	cardiac muscle tissue development	-2.70969	-4.7666	5/166	2066,7248,7490,8131,54583	ERBB4,TSC1,WT1,NPRL3,EGLN1
12_Member	GO Biological Processes	GO:0014706	striated muscle tissue development	-2.07887	-4.36875	6/329	2066,4763,7248,7490,8131,54583	ERBB4,NF1,TSC1,WT1,NPRL3,EGLN1
12_Member	GO Biological Processes	GO:0060537	muscle tissue development	-2.00104	-4.32532	6/342	2066,4763,7248,7490,8131,54583	ERBB4,NF1,TSC1,WT1,NPRL3,EGLN1
13_Summary	GO Biological Processes	GO:0021543	pallium development	-2.8654	-4.86104	5/153	3091,4763,4967,7248,26047,2066,1201	HIF1A,NF1,OGDH,TSC1,CNTNAP2,ERBB4,CLN3
13_Member	GO Biological Processes	GO:0021543	pallium development	-2.8654	-4.86104	5/153	3091,4763,4967,7248,26047	HIF1A,NF1,OGDH,TSC1,CNTNAP2
13_Member	GO Biological Processes	GO:0021537	telencephalon development	-2.85672	-4.85672	6/228	2066,3091,4763,4967,7248,26047	ERBB4,HIF1A,NF1,OGDH,TSC1,CNTNAP2
13_Member	GO Biological Processes	GO:0021761	limbic system development	-2.69706	-4.76213	4/100	4763,4967,7248,26047	NF1,OGDH,TSC1,CNTNAP2
13_Member	GO Biological Processes	GO:0021987	cerebral cortex development	-2.61984	-4.71327	4/105	3091,4763,7248,26047	HIF1A,NF1,TSC1,CNTNAP2
13_Member	GO Biological Processes	GO:0007612	learning	-2.2879	-4.50274	4/130	1201,3091,4763,26047	CLN3,HIF1A,NF1,CNTNAP2
13_Member	GO Biological Processes	GO:0008306	associative learning	-2.15789	-4.41485	3/73	1201,3091,4763	CLN3,HIF1A,NF1
14_Summary	GO Biological Processes	GO:0006913	nucleocytoplasmic transport	-2.71727	-4.77034	8/423	2066,3320,4763,7248,7249,55677,64901,129138,1793,2246,3783,5777,55740,10062,537,5770,55726	ERBB4,HSP90AA1,NF1,TSC1,TSC2,IWS1,RANBP17,ANKRD54,DOCK1,FGF1,KCNN4,PTPN6,ENAH,NR1H3,ATP6AP1,PTPN1,ASUN
14_Member	GO Biological Processes	GO:0006913	nucleocytoplasmic transport	-2.71727	-4.77034	8/423	2066,3320,4763,7248,7249,55677,64901,129138	ERBB4,HSP90AA1,NF1,TSC1,TSC2,IWS1,RANBP17,ANKRD54
14_Member	GO Biological Processes	GO:0002768	immune response-regulating cell surface receptor signaling pathway	-2.6936	-4.76213	9/527	1793,2066,2246,3320,3783,4763,5777,7249,55740	DOCK1,ERBB4,FGF1,HSP90AA1,KCNN4,NF1,PTPN6,TSC2,ENAH
14_Member	GO Biological Processes	GO:0051169	nuclear transport	-2.68557	-4.76112	8/428	2066,3320,4763,7248,7249,55677,64901,129138	ERBB4,HSP90AA1,NF1,TSC1,TSC2,IWS1,RANBP17,ANKRD54
14_Member	GO Biological Processes	GO:0014065	phosphatidylinositol 3-kinase signaling	-2.61984	-4.71327	4/105	2066,4763,5777,7249	ERBB4,NF1,PTPN6,TSC2
14_Member	GO Biological Processes	GO:0002764	immune response-regulating signaling pathway	-2.50891	-4.62948	10/671	1793,2066,2246,3320,3783,4763,5777,7249,10062,55740	DOCK1,ERBB4,FGF1,HSP90AA1,KCNN4,NF1,PTPN6,TSC2,NR1H3,ENAH
14_Member	GO Biological Processes	GO:0048015	phosphatidylinositol-mediated signaling	-2.32604	-4.50524	5/204	2066,2246,4763,5777,7249	ERBB4,FGF1,NF1,PTPN6,TSC2
14_Member	GO Biological Processes	GO:0048017	inositol lipid-mediated signaling	-2.29945	-4.50524	5/207	2066,2246,4763,5777,7249	ERBB4,FGF1,NF1,PTPN6,TSC2
14_Member	GO Biological Processes	GO:0014066	regulation of phosphatidylinositol 3-kinase signaling	-2.07872	-4.36875	3/78	2066,5777,7249	ERBB4,PTPN6,TSC2
14_Member	GO Biological Processes	GO:0070372	regulation of ERK1 and ERK2 cascade	-2.04963	-4.34849	5/238	537,2066,2246,5770,5777	ATP6AP1,ERBB4,FGF1,PTPN1,PTPN6
14_Member	GO Biological Processes	GO:0034504	protein localization to nucleus	-2.00104	-4.32532	6/342	2066,3320,4763,7249,55726,64901	ERBB4,HSP90AA1,NF1,TSC2,ASUN,RANBP17
15_Summary	GO Biological Processes	GO:0035637	multicellular organismal signaling	-2.52637	-4.64364	5/183	6263,26047,29119,80333,93589,2028,3091,3320,5125	RYR3,CNTNAP2,CTNNA3,KCNIP4,CACNA2D4,ENPEP,HIF1A,HSP90AA1,PCSK5
15_Member	GO Biological Processes	GO:0035637	multicellular organismal signaling	-2.52637	-4.64364	5/183	6263,26047,29119,80333,93589	RYR3,CNTNAP2,CTNNA3,KCNIP4,CACNA2D4
15_Member	GO Biological Processes	GO:0008015	blood circulation	-2.31349	-4.50524	8/493	2028,3091,3320,5125,6263,29119,80333,93589	ENPEP,HIF1A,HSP90AA1,PCSK5,RYR3,CTNNA3,KCNIP4,CACNA2D4
15_Member	GO Biological Processes	GO:0003013	circulatory system process	-2.29792	-4.50524	8/496	2028,3091,3320,5125,6263,29119,80333,93589	ENPEP,HIF1A,HSP90AA1,PCSK5,RYR3,CTNNA3,KCNIP4,CACNA2D4
15_Member	GO Biological Processes	GO:1903522	regulation of blood circulation	-2.29572	-4.50524	6/296	3091,3320,6263,29119,80333,93589	HIF1A,HSP90AA1,RYR3,CTNNA3,KCNIP4,CACNA2D4
15_Member	GO Biological Processes	GO:0061337	cardiac conduction	-2.2879	-4.50274	4/130	6263,29119,80333,93589	RYR3,CTNNA3,KCNIP4,CACNA2D4
15_Member	GO Biological Processes	GO:0008016	regulation of heart contraction	-2.17322	-4.41873	5/222	3320,6263,29119,80333,93589	HSP90AA1,RYR3,CTNNA3,KCNIP4,CACNA2D4
16_Summary	GO Biological Processes	GO:1903311	regulation of mRNA metabolic process	-2.49082	-4.61467	4/114	3191,51594,54715,55677	HNRNPL,NBAS,RBFOX1,IWS1
16_Member	GO Biological Processes	GO:1903311	regulation of mRNA metabolic process	-2.49082	-4.61467	4/114	3191,51594,54715,55677	HNRNPL,NBAS,RBFOX1,IWS1
17_Summary	GO Biological Processes	GO:0001503	ossification	-2.48197	-4.61231	7/363	537,1192,1213,2719,3091,4763,7290	ATP6AP1,CLIC1,CLTC,GPC3,HIF1A,NF1,HIRA
17_Member	GO Biological Processes	GO:0001503	ossification	-2.48197	-4.61231	7/363	537,1192,1213,2719,3091,4763,7290	ATP6AP1,CLIC1,CLTC,GPC3,HIF1A,NF1,HIRA
17_Member	GO Biological Processes	GO:0001649	osteoblast differentiation	-2.29945	-4.50524	5/207	537,1192,1213,4763,7290	ATP6AP1,CLIC1,CLTC,NF1,HIRA
18_Summary	Canonical Pathways	M254	PID MYC REPRESS PATHWAY	-2.3361	-4.50636	3/63	4802,6688,7249	NFYC,SPI1,TSC2
18_Member	Canonical Pathways	M254	PID MYC REPRESS PATHWAY	-2.3361	-4.50636	3/63	4802,6688,7249	NFYC,SPI1,TSC2
19_Summary	GO Biological Processes	GO:0050672	negative regulation of lymphocyte proliferation	-2.29806	-4.50524	3/65	5777,7940,64115,10062	PTPN6,LST1,C10orf54,NR1H3
19_Member	GO Biological Processes	GO:0050672	negative regulation of lymphocyte proliferation	-2.29806	-4.50524	3/65	5777,7940,64115	PTPN6,LST1,C10orf54
19_Member	GO Biological Processes	GO:0032945	negative regulation of mononuclear cell proliferation	-2.29806	-4.50524	3/65	5777,7940,64115	PTPN6,LST1,C10orf54
19_Member	GO Biological Processes	GO:0070664	negative regulation of leukocyte proliferation	-2.22572	-4.45872	3/69	5777,7940,64115	PTPN6,LST1,C10orf54
19_Member	GO Biological Processes	GO:0002695	negative regulation of leukocyte activation	-2.18607	-4.42662	4/139	5777,7940,10062,64115	PTPN6,LST1,NR1H3,C10orf54
19_Member	GO Biological Processes	GO:0050866	negative regulation of cell activation	-2.00383	-4.32532	4/157	5777,7940,10062,64115	PTPN6,LST1,NR1H3,C10orf54
20_Summary	KEGG Pathway	hsa05100	Bacterial invasion of epithelial cells	-2.07872	-4.36875	3/78	1213,1793,29119	CLTC,DOCK1,CTNNA3
20_Member	KEGG Pathway	hsa05100	Bacterial invasion of epithelial cells	-2.07872	-4.36875	3/78	1213,1793,29119	CLTC,DOCK1,CTNNA3
